1 **Modulation of defence and iron homeostasis genes in rice roots by the diazotrophic endophyte**

2 *Herbaspirillum seropedicae*

3

4 Brusamarello-Santos,<sup>1</sup> L.C.C, Alberton,<sup>2</sup> D., Valdameri,<sup>2</sup> G., Camilios-Neto,<sup>1,6</sup> D., Covre,<sup>3</sup> R., Lopes,<sup>3</sup>  
5 K., Tadra-Sfeir,<sup>1</sup> M.Z., Faoro,<sup>1,7</sup> H., Monteiro, R. A.<sup>1</sup>, Silva,<sup>3,8</sup> A.B., Broughton<sup>4</sup>, W. J., Pedrosa,<sup>1</sup> F.O.,  
6 Wassem,<sup>5</sup> R., Souza\*,<sup>1</sup> E.M.

7 <sup>1</sup>Departamento de Bioquímica e Biologia Molecular, Universidade Federal do Paraná, Curitiba, PR,  
8 Brasil

9 <sup>2</sup>Departamento de Patologia Médica, Setor Ciências da Saúde, Curitiba, PR, Brasil

10 <sup>3</sup>Setor de Educação Profissional e Tecnológica, Universidade Federal do Paraná, Curitiba, PR, Brasil

11 <sup>4</sup>Federal Institute of Materials Research and Testing, Division 4 Environment, Berlin, Germany

12 <sup>5</sup>Departamento de Genética, Universidade Federal do Paraná, Curitiba, PR, Brasil

13 <sup>6</sup> Present address: Departamento de Bioquímica e Biotecnologia, Universidade Estadual de Londrina,  
14 Londrina, PR, Brasil

15 <sup>7</sup> Present address: Instituto Carlos Chagas – Fiocruz, Curitiba, PR, Brasil

16 <sup>9</sup> Present address: Luxembourg Centre for Systems Biomedicine (LCSB), University of Luxembourg,  
17 Esch-sur-Alzette, Luxembourg.

18

19 **\* Corresponding author:**

20 Address: Universidade Federal do Paraná/UFPR, Rua Coronel Francisco Heráclito dos  
21 Santos, s/n Caixa Postal 19046, 81531-980 – Curitiba,

22 E-mail: [souzaem@ufpr.br](mailto:souzaem@ufpr.br)

23 Telephone and fax : +55413361-1667

24

25 **E-mail of authors:**

26 Brusamarello-Santos, L.C.C: [lizianebrusa@gmail.com](mailto:lizianebrusa@gmail.com)

27 Alberton, D.: [dayalberton@yahoo.com.br](mailto:dayalberton@yahoo.com.br)

28 Valdameri, G.: [glaucio\\_valdameri@hotmail.com](mailto:glaucio_valdameri@hotmail.com)

29 Camilios-Neto, D.: [camiliosneto@yahoo.com.br](mailto:camiliosneto@yahoo.com.br)

30 Covre, R.: [Covrebio06@gmail.com](mailto:Covrebio06@gmail.com)

31 Lopes, K.: [katiaplopes@gmail.com](mailto:katiaplopes@gmail.com)

32 Tadra-Sfeir, M.Z.: [mzitadrasfeir@gmail.com](mailto:mzitadrasfeir@gmail.com)

33 Faoro, H.: [hfaoro@gmail.com](mailto:hfaoro@gmail.com)

34 Monteiro, R. A.: [roseadele@gmail.com](mailto:roseadele@gmail.com)

35 Silva, A.B.: [adriano.bioinfo@gmail.com](mailto:adriano.bioinfo@gmail.com)

36 Broughton, William J.: [williamebroughton@gmail.com](mailto:williamebroughton@gmail.com)

37 Pedrosa, F.O.: [fpedrosa@ufpr.br](mailto:fpedrosa@ufpr.br)

38 Wassem, R.: [wassem@ufpr.br](mailto:wassem@ufpr.br)

39 **Date of submission: February 05, 2018**

40 **Number of tables: 5**

41 **Number of figures: 6** (Figure 1, 3, 5,6 (colour online-only) , figure 2,4 (black-and-white)

42 **Word count: 6421**

43 **Supplementary data: 3 tables**

44

45 **Modulation of defence and iron homeostasis genes in rice roots by the diazotrophic endophyte**

46 *Herbaspirillum seropedicae*

47

48 **Running title:** Modulation of defence-related rice genes by *H. seropedicae*

49

50 **Highlights**

51

52 RNASeq of *H. seropedicae* colonised rice roots showed remarkable regulation of defence, metal  
53 transport, stress and signalling genes. Fe-uptake genes were highly induced with implications in plant  
54 nutrition and immunity.

55

56 **Abstract**

57

58 Rice is staple food of nearly half the world's population. Rice yields must therefore increase to feed  
59 ever larger populations. By colonising rice and other plants, *Herbaspirillum* spp. stimulate plant  
60 growth and productivity. However the molecular factors involved are largely unknown. To further  
61 explore this interaction, the transcription profiles of Nipponbare rice roots inoculated with  
62 *Herbaspirillum seropedicae* were determined by RNA-seq. Mapping the 104 million reads against the

63 *Oryza sativa* cv. Nipponbare genome produced 65 million unique mapped reads that represented  
64 13,840 transcripts each with at least two-times coverage. About 7.4 % (1,019) genes were  
65 differentially regulated and of these 256 changed expression levels more than two times. Several of the  
66 modulated genes encoded proteins related to plant defence (e.g. a putative probenazole inducible  
67 protein), plant disease resistance as well as enzymes involved in flavonoid and isoprenoid synthesis.  
68 Genes related to the synthesis and efflux of phytoalexins (PS) and transport of PS-iron  
69 complexes were also induced by the bacteria. These data suggest that the bacterium represses the rice  
70 defence system while concomitantly activating iron uptake. Transcripts of *H. seropedicae* were also  
71 detected amongst which genes involved in nitrogen fixation, cell motility and cell wall synthesis were  
72 the most expressed.

73

74 **Keywords:** *Herbaspirillum seropedicae*, rice, biotic stresses, flavonoids, nitrogen fixation, pathogenic  
75 responses, pathogen-associated molecular patterns (PAMPs)

76

## 77 **Introduction**

78 To answer the ever increasing demand for cereals, genetic improvement of rice and the  
79 concomitant development of bio-fertilisers are promising, low environmental-impact solutions. After  
80 water, the most limiting nutrient in plant development is nitrogen and nitrogenous fertilisers have been  
81 heavily used in rice cultivation (Ladha and Reddy, 2003). Heavy use of nitrogen fertilisers causes  
82 environmental damage including contamination of ground-water and the release of nitrogen oxides.

83 An alternative to the use of nitrogenous fertilisers is to employ plant-associated micro-  
84 organisms that fix nitrogen. *Herbaspirillum seropedicae* is an endophytic diazotrophic that can  
85 colonise many plants and improve their productivity (reviewed by Monteiro *et al.*, 2012; Chubatsu *et*  
86 *al.*, 2012). Inoculation of rice with *H. seropedicae* increased root and shoot biomass by 38 to 54 % and  
87 22 to 50 % respectively (Gyaneshwar *et al.*, 2002) part of which was attributable to biological nitrogen  
88 fixation (James, 2000; Gyaneshwar *et al.*, 2002; James *et al.*, 2002; Roncato-Maccari *et al.*, 2003).  
89 Pankiewicz *et al.* (2015) showed that the nitrogen fixed by *H. seropedicae* and *Azospirillum brasilense*  
90 was rapidly incorporated into *Setaria viridis*. Other factors, including production of phyto-hormones  
91 by the bacteria stimulate plant growth and several authors have observed that the increase in biomass  
92 of inoculated plants is dependent on the plant genotype (Gyaneshwar *et al.*, 2002; Sasaki *et al.*, 2010).

93 Transcriptome based studies are powerful tools to detect differentially expressed genes and  
94 discover novel molecular processes (Nobuta *et al.*, 2007; Mizuno *et al.*, 2010; Xu *et al.*, 2012, Xu-H *et*  
95 *al.* 2015; Wakasa *et al.*, 2014; Magbanua *et al.*, 2014; Shankar *et al.*, 2016). Expression analyses  
96 (using EST sequencing and RT-qPCR) of rice roots inoculated with *H. seropedicae* suggested that  
97 genes related to auxin and ethylene syntheses as well as defence are modulated by the microorganism  
98 in a cultivar dependent manner (Brusamarello-Santos *et al.*, 2011). Here we used RNA-seq to profile  
99 the transcriptome of rice inoculated with *H. seropedicae*.

100

## 101 **Materials and Methods**

### 102 **Plant material and growth conditions**

103 Testas were removed from seeds of rice (*Oryza sativa* ssp *japonica* cv. Nipponbare, kindly provided  
104 by the Instituto Riograndense do arroz, IRGA – Avenida Missões 342, Porto Alegre, RS, Brazil), then  
105 disinfected with 70 % (v/v) ethanol for 5 min followed by 30 min soaking in 8 % sodium hypochlorite  
106 (1 mL per seed) containing 0.1 % v/v Triton-X100. After rinsing 20 times with sterile water, the seeds  
107 were treated with 0.025 % (v/v) Vitavax-Thiram (Chentura, Avenida Nações Unidas 4777, Alto de  
108 Pinheiros, São Paulo, SP, Brazil) fungicide solution and stirred (120 rpm) for 24 h in the dark at 30 °C.  
109 The seeds were then transferred to 0.7 % water-agar and left for two days to germinate after which the  
110 seedlings were inoculated with 1 mL of *Herbaspirillum seropedicae* strain SmR1 ( $10^8$  cells/seedling)  
111 for 30 minutes while control seedlings were treated with 1 mL of N-free NFbHP-malate medium  
112 (Klassen *et al.*, 1997) (controls). Seedlings were washed with sterile water and transferred to glass  
113 tubes (25 cm long, 2.5 cm diameter) containing propylene beads and 25 mL of modified Hoagland's  
114 solution (Hoagland and Arnon, 1950) without nitrogen (1mM  $\text{KH}_2\text{PO}_4$ , 1mM  $\text{K}_2\text{HPO}_4$ , 2mM  
115  $\text{MgSO}_4 \cdot 7\text{H}_2\text{O}$ , 2mM  $\text{CaCl}_2 \cdot 2\text{H}_2\text{O}$ , 1mL/L micronutrient solution ( $\text{H}_3\text{BO}_3$  2.86  $\text{g} \cdot \text{L}^{-1}$ ,  $\text{MnCl}_2 \cdot 4\text{H}_2\text{O}$  1.81  
116  $\text{g} \cdot \text{L}^{-1}$ ,  $\text{ZnSO}_4 \cdot 7\text{H}_2\text{O}$  0.22  $\text{g} \cdot \text{L}^{-1}$ ,  $\text{CuSO}_4 \cdot 5\text{H}_2\text{O}$  0.08  $\text{g} \cdot \text{L}^{-1}$ ,  $\text{Na}_2\text{MoO}_4 \cdot 2\text{H}_2\text{O}$  0.02  $\text{g} \cdot \text{L}^{-1}$ ) and 1mL.L<sup>-1</sup> Fe-  
117 EDTA solution ( $\text{Na}_2\text{H}_2\text{EDTA} \cdot 2\text{H}_2\text{O}$  13.4  $\text{g} \cdot \text{L}^{-1}$  and  $\text{FeCl}_3 \cdot 6\text{H}_2\text{O}$  6  $\text{g} \cdot \text{L}^{-1}$ ), pH 6.5-7.0. Plants were  
118 cultivated at 24 °C under 14 h light and 10 h dark for 3 days. *H. seropedicae* was cultivated in NFbHP  
119 malate medium containing 5 mM glutamate as the nitrogen source. Cells were shaken (120 rpm)  
120 overnight at 30 °C, then centrifuged, washed once with N-free NFbHP-malate and suspended in the  
121 same medium to  $\text{OD}_{600} = 1$  (corresponding to  $10^8$  cells.mL<sup>-1</sup>). Strain SmR1 (Souza *et al.*, 2000) is a  
122 spontaneous streptomycin resistant mutant of strain Z78 (Baldani *et al.*, 1986). Root colonisation was  
123 monitored by counting the number of colony forming units (CFU) per gram of fresh root.

124 Approximately 100 mg of roots were washed in 70 % v/v ethanol for 1 min, 1% chloramine T for 1  
125 min followed by three washes with sterile water (Dobereiner *et al.*, 1995). The roots were then crushed  
126 with a mortar and pestle in 1 mL of NFbHP-malate and serial dilutions ( $10^{-1}$  to  $10^{-5}$ ) were plated onto  
127 solid NFbHP-malate containing 20 mM  $\text{NH}_4\text{Cl}$ . Two days later the cells were counted.

128

### 129 **RNA isolation and construction of libraries**

130 The roots were separated from the aerial part and immediately stored in RNA later™ (Life  
131 Technologies, Foster City, CA, USA) Total RNA was extracted from roots of five rice plants using a  
132 RNAqueos kit (Ambion, Austin, TX, USA). Contaminating genomic DNA was eliminated with  
133 RNase-free DNase I (Ambion) for 30 min at 37 °C. Total RNA (7 to 10 µg) was depleted of ribosomal  
134 RNA by treatment with a RiboMinus™ Plant Kit for RNA-Seq (Invitrogen, Carlsbad, CA, USA). The  
135 integrity and quality of the total RNA was checked spectrophotometrically and by agarose gel  
136 electrophoresis. Whole Transcriptome Analysis RNA Kits™ (Life Technologies) were used on 500 ng  
137 purified RNA to construct the libraries and sequencing was performed in a SOLiD4 (Life  
138 Technologies) sequencer.

139

### 140 **Sequencing and analysis of short reads**

141 SOLiD sequencing produced 161 million 50 bp reads that were analysed by SAET software  
142 (Applied Biosystems – Foster City, CA, EUA) to improve base calling, followed by quality trimming  
143 using the CLC Genomics Workbench (CLC bio, a QIAGEN Company, Silkeborgvej 2, DK-8000  
144 Aarhus C, Denmark) (quality scores higher than 0.05 and reads with less than 20 bp were discarded).  
145 Then the reads were mapped to the rice genome database from the MSU Rice Genome Annotation  
146 Project (<http://rice.plantbiology.msu.edu/>) using the following parameters: a minimum length fraction  
147 of 95 %, minimum similarity of 90 % and only one hit. Differential expression was analysed using  
148 DESeq (Anders and Huber, 2010) from RobiNA software (Lohse *et al.*, 2012). Genes covered at least  
149 twice were considered expressed and regulated when expression changed two times and the P-value  
150 was lower than 0.05.

151

### 152 **Quantification of mRNA levels using RT-qPCR**

153 Reverse transcription quantitative PCR (RT-qPCR) analyses were used to evaluate gene  
154 expression under the conditions described above. Total RNA was isolated from rice roots using the

155 TRI Reagent (Sigma, St. Louis, MO, USA) and contamination with genomic DNA was removed with  
156 DNase I (Life Technologies). The integrity and quality of the total RNA was confirmed by  
157 spectrophotometric analyses and electrophoresis. cDNA was produced from 1 µg DNase-treated total  
158 RNA using high-capacity cDNA reverse transcription kits (Life Technologies). The cDNA reaction  
159 was diluted 60 times before quantitative PCR using Power SYBR-Green PCR Master Mix on a Step  
160 One Plus Real Time-PCR System (both from Life Technologies). Primer sequences are listed in Table  
161 S1 and were designed with the Primer express 3.0 software (Applied Biosystems) and the NCBI  
162 primer designing tool using the genome sequence of *O. sativa* ssp. japonica cv. Nipponbare.  
163 Calibration curves for all primer sets were linear over four orders of magnitude ( $R^2 = 0.98$  to  $0.99$ ) and  
164 efficiencies were 90 % or higher. mRNA expression levels were normalised using the expression  
165 levels of actin 1, tubulin beta-2 chain (beta-2 tubulin) (Jain *et al.*, 2006) and a hypothetical protein  
166 (protein kinase) (Narsai *et al.*, 2010) using geNorm 3.4 software (Vandesompele *et al.*, 2002). The  
167 relative expression level was calculated according to Pfaffl (2001). Three independent samples were  
168 analysed for each condition and each sample was assayed in triplicate.

169

## 170 **Results and Discussion**

### 171 **Transcriptional analyses**

172 *H. seropedicae* enters rice roots via cracks at the points of lateral root emergence and later  
173 (three to 15 days) colonises the intercellular spaces, aerenchyma, cortical cells and vascular tissue  
174 (Elbeltagy *et al.*, 2001; Gyaneshwar *et al.*, 2002; James *et al.*, 2002; Roncato-Maccari *et al.*, 2003). 14  
175 days after inoculation we observed an increase of weight of roots and leaf but this increase was not  
176 statistically significant. The number of endophytic *H. seropedicae* reached approximately  $10^5$  to  $10^6$   
177 CFU per gram of fresh root weight one to two days after inoculation (DAI), with a peak at three DAI  
178 (data not shown). For this reason roots were collected for RNA-seq analyses three DAI when the  
179 population of *H. seropedicae* had stabilised in the intercellular spaces and xylem (Roncato-Maccari *et al.*  
180 *et al.*, 2003). Rice plants inoculated in parallel with the samples used for RNA extraction contained  $4.2 \times$   
181  $10^5$  endophytic CFU.g<sup>-1</sup> of fresh roots and  $4.4 \times 10^8$  epiphytic CFU.g<sup>-1</sup> of root at three DAI.

182 Sixty-four percent of the reads (103,563,118) were finally used for mapping to the reference  
183 rice ([www.rice.plantbiology](http://www.rice.plantbiology)) and *H. seropedicae* genomes. Illustration of RNA-seq analyses is shown  
184 in Figure 1 and the numbers of reads mapped to each reference genome are listed in Table 1. Mapping

185 on the rice genome database (<http://rice.plantbiology.msu.edu/>) produced 22 million unique mapped  
186 reads representing 13,837 expressed transcripts.

187

### 188 **Differentially expressed genes**

189 Statistical analyses were performed using DESeq software (Anders and Huber, 2010) and comparison  
190 of non-inoculated with inoculated samples revealed 1,015 differentially expressed genes ( $P < 0.05$ ).  
191 Amongst these, 255 had fold-changes higher than two and they were functionally categorised using  
192 MapMan (<http://mapman.gabipd.org/>) (Figure 2). Considering the number of regulated genes in  
193 relation to the number of expressed genes in each category, the main categories down-regulated by *H.*  
194 *seropedicae* were: metal handling (9.0%; 4/41), polyamine metabolism (9.1%; 1/11), secondary  
195 metabolism (9%; 15/167), hormone metabolism (4.7%; 11/233); stress (4.8%; 24/503) and nucleotide  
196 metabolism (4.9%; 6/123). Among genes up-regulated by bacteria were those involved in  
197 gluconeogenesis/glyoxylate cycles (28.6%; 01/07), polyamine metabolism (27.3%; 03/11), metal  
198 handling (24.4%; 10/41), fermentation (23.1%; 03/13) and nitrogen metabolism (18.8%; 03/16)  
199 (Figure 2). Some of these categories of regulated genes were analysed in more detail below.

200

### 201 **Biotic and abiotic stresses**

202 Among the 255 differentially expressed genes (> 2fold), 59 were stress-related (30 repressed  
203 and 29 induced) in the following categories: secondary metabolites, hormone signalling, cell-wall,  
204 proteolysis, PR-proteins, signalling, transcription factors, redox-state, abiotic stress and peroxidases  
205 (Figure 3 and Table S2).

206

#### 207 *Secondary metabolism*

208 Amongst the secondary metabolic pathways with higher numbers of regulated genes were  
209 those involved in phenylpropanoid and isoprenoid synthesis (Table S2). Phenylpropanoids synthesised  
210 by deamination of L-phenylalanine are eventually converted to *p*-coumaric acid, a precursor of  
211 flavonoids and lignin (Ferrer *et al.*, 2008; Hassan and Mathesius, 2012). *H. seropedicae* modulated  
212 expression of four genes involved in flavonoid synthesis. Amongst them, the gene encoding chalcone  
213 isomerase (CHI), which catalyses the synthesis of naringenin from tetrahydroxy-chalcone (Naoumkina  
214 *et al.*, 2010), was repressed 2.1-fold. Naringenin is a key intermediate in the synthesis of other  
215 compounds including flavonol [flavonol synthase (FS), repressed 8.3-fold by *H. seropedicae*], and

216 anthocyanins [dihydroxiflavonol 4-reductase (DRF), repressed 2.5-fold]. In addition, isoflavone  
217 reductase (IFR) gene, involved in isoflavone synthesis, was repressed 1.3-fold ( $P = 0.01$ ). RT-qPCR of  
218 FS confirmed repression by *H. seropedicae* (Figure 4) but to a much lower extent (1.8-fold). Flavonols  
219 such as quercetin (Hassan and Mathesius, 2012) exhibit antimicrobial activity possibly by binding and  
220 inhibiting DNA gyrase (Plaper *et al.*, 2003). Previously, Balsanelli *et al.* (2010) showed that narigenin  
221 has antimicrobial activity against *H. seropedicae*.

222 Naoumkina *et al.* (2010) reported that flavonone-3- $\beta$ -hydroxylase was induced in rice  
223 following infection with *Xanthomonas oryzae*. Nematode cysts stimulate isoflavone synthesis  
224 (including chalcone reductases, chalcone isomerase, isoflavon 2'-hydroxylase, isoflavones and  
225 isoflavone reductase synthase) in soybeans. Our data thus indicate that down-regulation of  
226 flavonoid/isoflavone synthesis by *H. seropedicae* is part of the attenuation of the defence system in  
227 rice roots that is necessary to host an endophyte.

228 As mentioned above *p*-coumaric acid is also a precursor of lignin which is assembled from  
229 monolignols (Vanholme *et al.*, 2010). In this pathway cinnamoyl-CoA esters are converted into  
230 monolignols by two enzymes, cinnamoyl-CoA reductase (CCR) and cinnamyl alcohol dehydrogenase  
231 (CAD) (Boerjan *et al.*, 2003). RNA-seq data showed that a gene (LOC\_Os02g56700.1) encoding a  
232 cinnamoyl CoA reductase was induced 2.8-fold in rice inoculated with *H. seropedicae* (Table S2)  
233 while Kawasaki *et al.* (2006) reported that cinnamoyl-CoA reductase 1 (OsCCR1 -  
234 LOC\_Os02g56460.1) is an effector of the small GTPase Rac that is involved in defence responses in  
235 rice (Kawasaki *et al.*, 1999; Ono *et al.*, 2001; Suharsono *et al.*, 2002; Akamatsu *et al.*, 2013).  
236 Transcriptome analyses of rice inoculated with the endophyte *Harpophora oryzae* or the pathogen  
237 *Magnaporthe oryzae* showed that a cinnamoyl CoA reductase (LOC\_Os08g34280.1) like other  
238 enzymes in lignin synthesis was repressed in beneficial interactions and induced in pathogenic ones  
239 (Xu *et al.*, 2015). LOC\_Os08g34280.1 was also slightly repressed in our experiments ( $\approx 1.3$  fold). It  
240 therefore seems as if a balance between induction and repression of defence-related genes allows *H.*  
241 *seropedicae* to survive inside rice tissues while concomitantly activating some defence responses to  
242 protect the plant from pathogens.

243 Isoprenoid (or terpenoid) synthesis was also modulated by *H. seropedicae* (Table S2 and  
244 Figure 5). Isoprenoids are derived from isomeric compounds including isopentenyl diphosphate (IPP)  
245 and dimethylallyl diphosphate (DMAPP) (Chen *et al.*, 2011) via two pathways: the mevalonate  
246 pathway (MEV) and the methyl-erythritol phosphate pathway (MEP) (Figure 5). The MEV pathway



247 occurs in the cytoplasm and the MEP pathway in plastids (Vranová *et al.*, 2013) producing an  
248 estimated that 55,000 isoprenoid compounds. As a consequence, the biological function of these  
249 molecules is diverse and includes precursors of hormones, components of membranes, defence agents  
250 and carotenoids.

251 In rice, *H. seropedicae* repressed genes of the MEP pathway (Table S2 and Figure 5). The  
252 most repressed gene (5.9 times) encodes 1-deoxy-D-xylulose 5-phosphate synthase (DXS) the first  
253 enzyme of the pathway that synthesises 1-deoxy-D-xylulose 5-phosphate (DXP) from pyruvate and D-  
254 glyceraldehyde 3-phosphate. DXP is a precursor of antimicrobial compounds including phytoalexins.  
255 Chitin induces the MEP pathway in cultured rice cells and as a result phytoalexins accumulate (Okada  
256 *et al.*, 2007). Furthermore treatment of the cells with inhibitors of the enzymes DXS and 1-deoxy-D-  
257 xylulose 5-phosphate reductoisomerase (DXR) impeded chitin-dependent accumulation of  
258 phytoalexin. The authors suggest that activation of the MEP is required to meet the demand for  
259 isoprenoid and phytoalexin synthesis in infected cells. In our experiments and those of Drogue *et al.*  
260 (2014), the gene encoding stemar-13-ene synthase (OsDTC2), an enzyme involved in synthesis of  
261 phytoalexins in rice, was repressed 1.9-fold in *H. seropedicae* treated rice roots (Figure 5) and two-  
262 fold when infected with *Azospirillum* spp. (Drogue *et al.*, 2014). It thus seems as if *H. seropedicae*  
263 represses production of defence-related isoprenoids in rice roots perhaps to allow the bacteria to enter  
264 and rapidly colonise the intercellular spaces and xylem.

265

#### 266 *Oxidative stress responses*

267 In this study *H. seropedicae* modulated expression of five redox state genes including those  
268 for non-symbiotic hemoglobin 2 and peroxiredoxin. One peroxiredoxin gene (LOC\_Os07g44440.1)  
269 induced 3.7 and the other LOC\_Os01g16152.1 was repressed 2.1 fold. Peroxiredoxins are a group of  
270 H<sub>2</sub>O<sub>2</sub>-decomposing antioxidant enzymes related to the redox state. In addition to the reduction of  
271 H<sub>2</sub>O<sub>2</sub>, peroxiredoxin proteins also detoxify alkyl hydroperoxides and peroxinitrite (Rhee *et al.*, 2005;  
272 Dietz *et al.*, 2006).

273 Plants respond to attacks by pathogens with rapid increases in reactive oxygen species (ROS)  
274 such as superoxide and H<sub>2</sub>O<sub>2</sub> (Apostol *et al.*, 1989). Peroxidases produce ROS that could cause  
275 oxidative damage to proteins, DNA, and lipids. Many defects in the immune system of mature  
276 *Arabidopsis thaliana* plants with reduced expression of two key peroxidase genes, PRX33 or PRX34,  
277 were observed (Daudi *et al.*, 2012). Silencing the French-bean class III peroxidase (FBP1) in *A.*

278 *thaliana* impaired the oxidative burst and rendered plants more susceptible to bacterial and fungal  
279 pathogens (Bindschedler *et al.*, 2006). Proteomic studies of rice roots seven days after inoculation with  
280 *H. seropedicae* showed induction of ascorbate peroxidases (Alberton *et al.*, 2013), though the genes  
281 encoding these enzymes were not affected in our RNA-seq analyses. Moreover, seven days after  
282 inoculation, ROS levels in *Herbaspirillum rubrisubalbicans* attached to rice roots had increased  
283 suggesting that the bacteria were subject to oxidative stresses (Valdameri *et al.*, 2017). In this work,  
284 two peroxidase genes were induced by *H. seropedicae* in inoculated roots.

285

### 286 *Cell wall*

287 A variety of diazotrophic microorganisms such as *H. seropedicae* Z67, *H. rubrisubalbicans*  
288 and *A. brasilense* produce cell-wall degrading enzymes (Elbeltagy *et al.*, 2001; James *et al.*, 2002).  
289 Interestingly, the *H. seropedicae* SmR1 genome did not reveal genes coding for known cellulases,  
290 pectinases or any other cell-wall degrading enzymes (Pedrosa *et al.*, 2011). Nevertheless, rice roots  
291 inoculated with *H. seropedicae* induced a gene (2.0-fold) encoding a  $\beta$ -D-xylosidase and repressed  
292 2.4-fold a gene coding for a polygalacturonase suggesting re-modeling of plant cell wall. In *A.*  
293 *thaliana*,  $\beta$ -D-xylosidase has been shown to be involved in secondary cell-wall hemi-cellulose  
294 metabolism and plant development (Goujon *et al.*, 2003), but little is known about the function of this  
295 enzyme.

296 Other differentially expressed genes involved in cell-wall metabolism code for proteins  
297 similar to an expansin11 (induced 2.6-fold). Expansins have a loosening effect on plant cell-walls and  
298 function in cell enlargement as well as in diverse developmental processes in which cell-wall  
299 modification occurs including elongation. In addition, they promote elongation of root-hairs (Lin *et al.*,  
300 2011; ZhiMing *et al.*, 2011) and root-hair initiation (Kwasniewski and Szarejko, 2006).

301 Expansins have been correlated with plant-bacteria interactions. In tobacco, *Bacillus*  
302 *subtilis* G1, a plant growth promoting bacterium, induced the expression of two expansins NtEXP2 and  
303 NtEXP6 (Wang *et al.*, 2009). Also, inoculation of *Melilotus alba* with *Sinorhizobium meliloti* lead to  
304 enhanced MaEXP1 mRNA levels in roots and nodules (Giordano and Hirsch, 2004). Together, these  
305 results suggest that inoculation with *H. seropedicae* also led to modification of plant cell wall which  
306 may facilitate bacterial colonization of inner tissue by loosening cell wall.

307

### 308 *Plant immune responses*

309           The plant immune system can sense and respond to pathogen attacks in two manners: the first  
310 involves recognition of pathogen/microbe associated molecular patterns (PAMPs) by surface pattern-  
311 recognition receptors (PRRs) resulting in pattern-triggered immunity (PTI). Second, resistance proteins  
312 (R) that recognise pathogen effectors are expressed leading to effector-triggered immunity (ETI)  
313 (Abramovitch *et al.*, 2006; Jones and Dangl, 2006; McDowell and Simon, 2008). Among the regulated  
314 genes that have functions involved in defence (in dark gray squares in Figure 3), as determined by  
315 MapMan, three genes encoding PR-proteins were repressed (LOC\_Os10g25870.1,  
316 LOC\_Os11g07680.1, LOC\_Os02g38392.1, 2.5, 3.4 and 2.7-fold respectively) while one transcript  
317 that encoded a lipase called EDS1 (enhanced disease susceptibility 1) was induced 2-fold.

318           The role of EDS1 in defence is well described in *Arabidopsis* and is required for resistance  
319 conditioned by R genes which encode proteins that contain nucleotide-binding sites and leucine-rich  
320 repeats (NBS-LLR) (Aarts *et al.*, 1998; McHale *et al.*, 2006; Bartsch *et al.*, 2006; Jones and Dangl,  
321 2006; Venugopal *et al.*, 2009). Mutant *eds1* seedlings exhibited enhanced susceptibility to the  
322 biotrophic oomycete *Peronospora parasifica* (Parker *et al.*, 1996). Analysis of *EDS1* and *PR*-gene  
323 expression showed induction of both genes after inoculation with *Pseudomonas syringae* or treatment  
324 with salicylic acid (SA) (Falk *et al.*, 1999). In addition, in the *Arabidopsis eds1* mutant, the expression  
325 of PR-proteins was undetectable. When the *eds1* mutant was treated with SA however, expression of  
326 PR was detected. The authors suggest that EDS1 functions upstream of *PR1*-mRNA accumulation.  
327 Among the 3 genes for PR-proteins repressed, one (LOC\_Os02g38392.1) is a NBS-LRR disease  
328 resistance protein. Therefore in *H. seropedicae*- rice interaction an inverse correlation between PR-  
329 protein and EDS1 expression was observed, perhaps suggesting a fine regulation of these defence  
330 systems by *H. seropedicae*.

331           In previous work down-regulation of genes associated with defence was observed in rice  
332 plants inoculated with *H. seropedicae* such as a putative probenazole inducible protein (PBZ1,  
333 LOC\_Os12g36840.1) that was repressed 3.6-fold as shown by RT-qPCR analysis (Brusamarello-  
334 Santos *et al.*, 2011). RNA-seq data showed that this gene (LOC\_Os12g36840.1) was repressed 2.9-  
335 fold. Another two genes coding proteins similar to PBZ1 (LOC\_Os12g36830.1 and  
336 LOC\_Os12g36850.1) were also repressed (7.2 and 4.1, respectively). Kawahara *et al.* (2012) using an  
337 RNA-seq approach to study the transcriptome of rice inoculated with the blast fungus *M. oryzae*  
338 observed that the same PBZ1 genes detected in our study were induced 273 and 233-fold upon

339 inoculation with the pathogen. The induction of PBZ1 gene by pathogens has been considered as a  
340 molecular marker for rice defence response (Kim *et al.*, 2008).

341 Another gene regulated by *H. seropedicae* that is related to defence codes for a thionin, a  
342 small cysteine-rich protein that occurs in a broad range of plant species (Florack and Stiekema W.J.,  
343 1994). Thionins are known for their toxicity to plant pathogens and several studies showed that their  
344 over-expression is related to increased resistance to diseases (Iwai *et al.*, 2002; Choi *et al.*, 2008;  
345 Muramoto *et al.*, 2012; Ji *et al.*, 2015).

346 Brusamarello-Santos *et al.* (2011) showed 5-fold repression of thionin genes from  
347 chromosome 6 seven days after inoculation with *H. seropedicae* but these thionins from chromosome  
348 6 were not regulated in roots three days after inoculation with *H. seropedicae*. Since there are 15  
349 thionin genes (according to the Rice Genome Annotation Project RGAP7) sharing high identity in  
350 chromosome 6, we mapped the unmapped reads to the rice genome as well as to chromosome 6  
351 separately and observed an average of 480 mapped reads for control libraries and 136 for inoculated  
352 libraries mapping on thionin genes, a result that is in accordance with repression patterns observed in  
353 rice roots seven days after inoculation with *H. seropedicae* (Brusamarello-Santos *et al.*, 2011).  
354 Interestingly, we observed a thionin transcript from chromosome 7 (LOC\_Os07g24830.1) that was  
355 induced 7.2-fold in the presence of *H. seropedicae* three DAI. Time-dependent regulation of thionin  
356 was also observed by Ji *et al.* (2015) in rice roots infected with *Meloidogyne graminicola*. In a by  
357 Straub and co-workers study only a few defence-related genes were induced in the transcriptome of  
358 *Miscanthus sinensis* inoculated with *Herbaspirillum frisingense* helping to explain why this bacterium  
359 can effectively invade and colonise plants (Straub *et al.*, 2013).

360

## 361 **Signalling**

### 362 *Plant Receptor*

363 The plant immune system employ, at the cell surface, receptors to perceive pathogen associated  
364 molecular patterns (PAMPs) or damage associated molecular patterns (DAMPs). Theses receptors have  
365 an ectodomain potentially involved in ligand binding, a single transmembrane domain and, most of times,  
366 a intracellular kinase domain (Couto and Zipfel, 2016).

367 Amongst the genes with the highest expression differences seen in RNA-seq data was a wall-  
368 associated receptor kinase-like (WAK) 22 precursor gene (LOC\_Os10g07556.1), repressed 93-fold  
369 (30-fold by RT-qPCR) in *H. seropedicae* inoculated roots. Cell wall-associated receptor kinases

370 (WAKs) contain an extracellular domain composed of one or more epidermal growth factor repeats  
371 (EGF). Animal proteins containing these repeats are known to bind small peptides (Hynes and  
372 MacDonald, 2009). In *A. thaliana* WAKs bind to cross-linked pectin cell wall, pathogen- or damage-  
373 induced pectin fragments and oligogalacturonides, thus regulating cell expansion or stress response  
374 depending on the state of the pectin (Kohorn and Kohorn, 2012; Kohorn, 2015, 2016). Several studies  
375 have described the role of WAK genes in rice resistance to pathogens (Li *et al.*, 2009; Cayrol *et al.*,  
376 2016; Harkenrider *et al.*, 2016; Delteil *et al.*, 2016). Plant proteins show a similar domain architecture  
377 consisting of cell-wall pectin binding extracellular region, the EGF-like domain, and a kinase domain.  
378 Analyses of rice loss-of-function mutants of WAK genes showed that individual genes are important  
379 for resistance against *M. oryzae*. OsWAK14, OsWAK91 and OsWAK92 positively regulate resistance  
380 while OsWAK112d is a negative regulator of blast resistance (Delteil *et al.*, 2016). Cayrol *et al.* (2016)  
381 demonstrated that OsWAK14, OsWAK91 and OsWAK92 can form homo- and hetero-complexes and  
382 hypothesized that the loss of function of any of these proteins may destabilized the complex and affect  
383 their functioning. In *A. thaliana* the WAK22 orthologous gene (AtWAKL10) encodes a functional  
384 guanylyl cyclase which is co-expressed with pathogen defence related genes (Meier *et al.*, 2010). Thus  
385 the wall-associated receptor kinase-like 22 gene of rice could be a candidate for surface pattern  
386 recognition receptor and its repression may allow *H. seropedicae* to evade activation of the plant-  
387 defence system.

388 A cysteine-rich receptor-like protein kinase (CRK) gene (LOC\_Os04g56430.1) and a  
389 serine/threonine-protein kinase At1g18390 precursor (LOC\_Os05g47770.1) were induced 3.2-fold and  
390 2-fold, respectively, while a lectin-like receptor kinase 7 (LOC\_Os07g03790.1) and SHR5-receptor-  
391 like kinase (LOC\_Os08g10320.1) were repressed 2.7 and 2.5-fold respectively in the presence of *H.*  
392 *seropedicae* (Table S2). The latter protein has 75% identity with sugarcane SHR5 receptor kinase  
393 repressed by colonisation with diazotrophic endophytes (Vinagre *et al.*, 2006). The authors suggested  
394 that the expression levels of this gene were inversely related to the efficiency of beneficial plant-  
395 bacterial interactions (Vinagre *et al.*, 2006). Besides in *Arabidopsis* cysteine rich receptor-like kinase 5  
396 protein is involved in regulation of growth, development, and acclimatory responses (Burdiak *et al.*,  
397 2015).

398

399 *Auxin signalling*

400 Auxins regulate diverse physiological processes such as vascular tissue differentiation, lateral  
401 root initiation and have also been linked to defence in plant-pathogen interactions (Rogg and Bartel,  
402 2001; Kazan and Manners, 2009; McSteen, 2010; Adamowski and Friml, 2015). Auxin response  
403 elements (AuxREs), when bound to auxin response factors (ARFs), control auxin-dependent gene  
404 expression. The Aux/IAA protein family members that inhibit ARFs mediate this regulation  
405 (Guilfoyle, 2015).

406 Four differentially expressed genes related to auxin signalling were identified in rice roots  
407 inoculated with *H. seropedicae*. The gene LOC\_Os08g24790.1 encoding an auxin-responsive protein  
408 was repressed 2.1-fold (Table 2) whereas the genes coding for auxin-induced proteins,  
409 LOC\_Os09g25770.1 and LOC\_Os05g01570.1, were repressed 1.8 and 2.5-fold, respectively.  
410 Repression of genes related to auxin signalling was reported in rice roots inoculated with *H.*  
411 *seropedicae* (Brusamarello-Santos et al. 2011). Brusamarello-Santos et al. (2011) found that ARF2-  
412 like, IAA 11 and IAA18 were repressed, 1.4, 1.5 and 2.8-fold respectively, in the presence of *H.*  
413 *seropedicae* 7 days after inoculation. These genes were not regulated in our data probably due to the  
414 time difference of the cDNA library construction and too low expression levels.

415 *H. seropedicae* can produce IAA in the presence of tryptophan, thus suggesting the plant  
416 growth promotion effect may be due to bacterial derived auxin (Bastian *et al.*, 1998). In addition  
417 exogenous application of auxin lead to increase in lateral root numbers (Inukai *et al.*, 2005). However  
418 the number of lateral roots in rice plants inoculated and non-inoculated with *H. seropedicae*, was  
419 determined (data not shown) but no significant difference was observed.

420 In the absence of clear regulation of auxin-dependent genes and phenotype, the results suggest  
421 that auxin does not play an important role in Nipponbare rice roots colonization by *H. seropedicae*. On  
422 the other hand the repression of auxin signalling has been correlated to defence responses. Auxin  
423 levels have been correlated with susceptibility to pathogens (Kazan and Manners, 2009) that are able  
424 to produce high levels of auxin (Jameson, 2000). It has also been shown that pathogen-associated  
425 molecular patterns (PAMPs) induce the expression of a miRNA that negatively regulates mRNAs for  
426 F-box auxin receptors leading to resistance to *P. syringae* in *Arabidopsis* (Navarro *et al.*, 2006). The  
427 observed repression in several genes involved with defence in the rice-*H. seropedicae* interaction  
428 opens the question whether auxin could be important for bacteria survival inside the plant by down-  
429 regulation defence system. Further studies are needed to elucidate if and how auxin signalling  
430 participates in plant-bacterial interactions.

431

432 *Ethylene signalling*

433 Ethylene is also involved in several biological processes that activate defence responses and  
434 adventitious root-growth in rice and other plants (Lorbiecke and Sauter, 1999; Glazebrook, 2005;  
435 Robert-Seilaniantz *et al.*, 2011). Ethylene can be synthesised by oxidation of 1-aminocyclopropane-1-  
436 carboxylate (ACC) by ACC oxidase. ACC is synthesised from adenosylmethionine (AdoMet) by ACC  
437 synthase (ACS). ACS is up regulated 6-fold and ACC oxidase is repressed 2-fold by inoculation with  
438 *H. seropedicae*. An ethylene response factor (ERF) (LOC\_Os01g04800.1) gene was also induced 2.2-  
439 fold in inoculated roots. These data indicate that ethylene synthesis is attenuated in the presence of  
440 bacteria. Moreover Alberton *et al.* (2013) measured the level of ethylene in inoculated rice roots (seven  
441 days after inoculation) and found a decrease of ethylene levels. Furthermore, Valdameri *et al.* (2017)  
442 detected induction of ACC oxidase in rice plants inoculated with the pathogen *H. rubrisubalbicans*.  
443 These results suggest that the ethylene pathway is differentially modulated in the presence of  
444 pathogens and beneficial endophytic bacteria that promote plant growth.

445

446 *SA signalling*

447 Salicylic acid is derived from phenolic compounds and is involved in response to attack by  
448 pathogens (Vlot *et al.*, 2009; An and Mou, 2011). In rice roots inoculated with *H. seropedicae*, a SA-  
449 dependent carboxyl methyltransferase family protein (LOC\_Os11g15340.2) was repressed 40-fold. A  
450 member of this family is salicylic acid carboxyl methyltransferase (SAMT) that catalyses the  
451 formation of methyl salicylate (MeSA) from SA (Ross *et al.*, 1999). MeSA is an essential signal for  
452 systemic acquired resistance (SAR) in tobacco plants. In addition mutations in SAMT showed that this  
453 gene is required for SAR (Park *et al.*, 2007).

454 SA signalling is differentially regulated by members of the WRKY transcription factor family  
455 (Eulgem and Somssich, 2007). In inoculated rice roots, two WRKY transcription factors were  
456 regulated, one repressed (2.3-fold) and one induced (2.0-fold). The induced gene encodes a WRKY51  
457 similar to WRKY11 of *Arabidopsis*, whereas the repressed gene encodes WRKY46, which was shown  
458 to be induced by SA in *Arabidopsis*. WRKY11 is a negative regulator of resistance (Journot-Catalino  
459 *et al.*, 2006) and *Arabidopsis* plants in which WRKY46 was over-expressed were more resistant to *P.*  
460 *syringae* (Hu *et al.*, 2012). These results are in agreement with the hypothesis that the SA signalling  
461 and defence system are attenuated in the presence of the *H. seropedicae*.

462

### 463 **Metal ion metabolism**

464 Several genes related to metal transport were differentially expressed, most of them up  
465 regulated in the presence of *H. seropedicae*. Amongst the 20 most highly regulated rice genes, eight  
466 were related to metal transport (Table 3; Table 4). Phyto-siderophore synthesis starts with production  
467 of nicotianamine (NA) from S-adenosylmethionine, which in turn is derived from 5'-  
468 methylthioadenosine of the methionine salvage pathway (MTA cycle) (Figure 6). Transcripts of  
469 enzymes of the MTA cycle encoding SAM, MTA nucleosidase, MTR kinase, E1 enolase/phosphatase  
470 and acireductone dioxygenase (ARD) were induced 1.9, 2.6, 6.0, 1.9 and 7.5-times, respectively, in  
471 roots colonised by *H. seropedicae* (Figure 6). Using proteomic and RT-qPCR analyses, Alberton  
472 (2013) observed similar expression patterns in rice roots inoculated with *H. seropedicae*.

473 The synthesis of NA and MAs involves a set of enzymes including S-adenosylmethionine  
474 syntase (SAM) that catalyses the adenylation of L-methionine to S-adenosylmethionine, nicotianamine  
475 synthase (NAS) that converts S-adenosylmethionine to nicotianamine, and nicotianamine  
476 aminotransferase (NAAT) that catalyses the amino transfer of NA to produce the 3''-keto intermediate  
477 that is reduced by deoxymugineic acid synthase (DMAS) to produce 2'- deoxymugineic acid (DMA)  
478 (Shojima *et al.*, 1990; Higuchi *et al.*, 1999; Bashir *et al.*, 2006; Inoue *et al.*, 2008).

479 Two nicotianamine synthase (NAS) genes of rice - LOC\_Os03g19420.2 and  
480 LOC\_Os03g19427.1 were induced (52- and 32-fold, respectively) in inoculated rice roots.  
481 LOC\_Os03g19427.1 was also induced in rice roots inoculated with *Azospirillum spp.* (Drogue *et al.*,  
482 2014). Increased levels of nicotianamine have been shown to increase Fe uptake in rice plants (Lee *et*  
483 *al.*, 2009). Furthermore, in *Lotus japonicus* inoculated with *Mesorhizobium loti*, nicotianamine  
484 synthase 2 was expressed only in nodules pointing to a role in symbiotic nitrogen fixation (Hakoyama  
485 *et al.*, 2009). A tomato mutant defective in the synthesis of nicotianamine was affected in iron  
486 metabolism (Ling *et al.*, 1996). In addition NAAT (LOC\_Os02g20360.1) and DMAS  
487 (LOC\_Os03g13390.2) were also induced 10-fold and 19-times respectively in colonised rice roots.  
488 Iron deficiency provoked induction of rice gene OsNAAT1 (Inoue *et al.*, 2008).

489 Recently, members of a major facilitator super-family have been described as essential to the  
490 efflux of MA and NA in rice. TOM1 (transporter of mugineic acid 1) is involved in the efflux of MA,  
491 while ENA1 (efflux transporters of nicotianamine 1) and ENA2 in the efflux of NA (Nozoye *et al.*,



492 2011). TOM1 (LOC\_Os11g04020.1) and ENA1 (LOC\_Os11g05390.1) were induced 40 and 3-fold in  
493 colonised roots. Induction of TOM1 was confirmed by RT-qPCR (Figure 4).

494  $\text{Fe}^{+++}$  ions chelated by PS need to be transported inside the cell. In gramineous plants, two  
495 groups of Fe-MA transporters are present: ZmYS1 (Curie *et al.*, 2001) and the YSL (yellow strip-like)  
496 transporter family (Inoue *et al.*, 2009). Inoue *et al.* (2009) analysed the expression of 18 YSL genes in  
497 rice and observed induction of OsYSL15 and OSYSL16 genes under iron-deficiency. Other studies  
498 have shown that OsYSL2 (LOC\_Os02g43370) takes up  $\text{Fe}^{2+}$ -NA (Ishimaru *et al.*, 2010) and OsYSL16  
499  $\text{Fe}^{3+}$ -DMA (LOC\_Os04g45900.1) (Takei *et al.*, 2012). Here we showed induction (3.2-fold) of  
500 OsYSL16 (LOC\_Os04g45900.1) and 21-fold increase of transcripts encoding a gene similar to  
501 OSYSL15 (LOC\_Os02g43410.1). Induction of OSYSL15 was confirmed by RT-qPCR (Figure 4).  
502 Furthermore, OsIRT1 (iron-regulated transporter 1) and OsIRT2 were also induced under low Fe  
503 conditions (Ishimaru *et al.*, 2006). We detected induction of OsIRT2 (LOC\_Os03g46454.1) (34-fold in  
504 RNA-seq and 93-fold in RT-qPCR) (Figure4).

505 Other metal transporters such as Nramp6 (LOC\_Os07g15460.1) were also up regulated (27-  
506 fold) in colonised rice roots, a result confirmed by RT-qPCR (Figure 4). Members of the natural  
507 resistance-associated macrophage protein (NRAMP) family are transition metal cation/proton co-  
508 transporters or anti-porters of broad specificity. AtNRAMP6 of *Arabidopsis* is up-regulated in  
509 response to iron deficiency and is involved with metal mobilization from vacuoles to cytosol (Thomine  
510 *et al.*, 2003). Induction of Nramp6 in rice roots colonised by *H. seropedicae*. In a previous study in  
511 rice inoculated with *Azospirillum* spp the expression of this gene was also induced (Drogue *et al.*  
512 2014). In addition a gene for an integral membrane protein (LOC\_Os09g23300.1) named OsVIT2 was  
513 17.7-fold repressed by *H. seropedicae*. This gene is involved in transport of Fe/Zn into vacuoles and is  
514 up-regulated in rice roots with excess Fe. Knockout/ knockdown of this gene led to Fe accumulation in  
515 seeds (Zhang *et al.*, 2012; Bashir *et al.*, 2013). Together, these results suggest that colonised roots  
516 respond in such a manner as to accumulate Fe.

517 Interestingly the transcript with the highest fold change [104-times – a result confirmed using  
518 RT-qPCR (Figure 4)] in colonised roots codes for the non-symbiotic hemoglobin 2  
519 (LOC\_Os03g12510.1). High levels of non-symbiotic hemoglobin 2 could help buffer free oxygen and  
520 protect bacterial nitrogenase. Arredondo-Peter *et al.* (1997) described two hemoglobins, Hb1 and Hb2,  
521 in rice. The Hb2 induced by *H. seropedicae* is very similar to the one described by Arredondo-Peter  
522 *et al.* (1997) (coverage 82 % with an identity of 97 %). In addition, Lira-Ruan *et al.* (2001) studied the

523 synthesis of hemoglobins in rice under normal and stress conditions, coming to the conclusion that Hbs  
524 are not part of a generalised stress response. They demonstrated that Hb1 is expressed in different rice  
525 organs (root and leaves) during plant development. In etiolated rice plants under O<sub>2</sub> limiting conditions  
526 the Hb levels increase (Lira-Ruan et al. 2001). This increase suggest that Hb expression maybe due to  
527 reduced O<sub>2</sub> levels in the presence of the bacteria which make the root environment microaerophilic.  
528 The higher requirement for Fe needed for incorporation into Hb may partially explain activation of  
529 siderophore synthesis and Fe accumulation. We also found a *H. seropedicae* bacterioferritin  
530 (Hsero\_1195) gene induced (2.2-fold), but symptoms of Fe deficiency in colonised rice plants were not  
531 observed.

532 Iron homeostasis has been related to plant defence, ROS accumulation and immunity. Also,  
533 Fe deficiency triggers accumulation of antimicrobial phenolics compounds. It has been suggested  
534 recently that Fe sequestration by bacterial siderophore could be a signal for pathogen infection (Aznar  
535 *et al.*, 2015). However, bacterial genes involved in siderophore biosynthesis were not observed among  
536 the *H. seropedicae* genes expressed in rice roots. Also, transcriptomic analysis of *H. seropedicae*  
537 attached to wheat and mayze roots did not show iron metabolism genes up-regulated (Pankiewicz *et al.*,  
538 2016; Balsanelli *et al.*, 2016). These results suggest that the effect of bacteria on plant iron  
539 meabolism is more complex than those caused by iron sequestration.

540

#### 541 **Transcripts expressed in interactions with bacteria**

542 The libraries from inoculated roots were mapped against the *H. seropedicae* genome (24,278  
543 reads). Amongst the 4,085 annotated genes, 287 had at least one-fold coverage (this set of genes was  
544 called *H. seropedicae* expressed genes). Functional classification of expressed genes was performed  
545 using the COG system. After ribosomal genes, the most abundant functional classes found were  
546 “unknown”, “energy production and conversion”, “amino acid transport and metabolism”, “cell  
547 motility and cell wall” (Table 5). Comparison of expressed genes of *H. seropedicae* detected in plants  
548 with bacterial genes expressed in culture revealed only 16 differences [p-value < 0.05 using the DESeq  
549 statistical package (Table 5)].

550 Genes involved in nitrogen fixation (*nif*) were found amongst genes classified as “energy  
551 production and conversion” and “amino acid transport and metabolism”. *Nif*-genes encode proteins  
552 involved in the synthesis, maturation and assembly of the nitrogenase complex (Chubatsu *et al.*, 2012).  
553 *nifD* and *nifH* (coverage 1.7 and 1.2 respectively) were highly expressed in *H. seropedicae* colonising

554 wheat and maize roots (Pankievicz *et al.*, 2016; Balsanelli *et al.*, 2016). We also found two ferredoxin  
555 genes important for nitrogenase activity: *fdxA* and *fdxN* (coverage 1.9 and 1.6) (Souza *et al.*, 2010).

556 The promoters of *nif* genes are activated by NifA that is regulated by the Ntr system. When  
557 comparisons were made between free-living *H. seropedicae* and those grown in association with rice,  
558 *glnK* and *amtB* of the Ntr system were induced 43 and 20-times respectively in the plant-bacterial  
559 interaction. Pankievicz *et al.* (2016) also found that *amtB* was induced in *H. seropedicae* attached to  
560 maize roots. Furthermore, *fixN* and *fixP* (both 1.6X coverage) were also detected *in planta* along with  
561 an *urtA* ABC-type urea transport system (Hsero\_4713) (27-fold of induction *in planta*).

562 Twenty-three genes related to cell motility were found, four with > 2X coverage. Amongst  
563 these were *cheW* (a positive regulator of CheA), *flhD*, *fliC* and *pilZ* (Hsero\_2062) that encodes a type  
564 IV pilus assembly protein. A methyl-accepting chemotaxis trans-membrane protein (Hsero\_2723) was  
565 induced 90-fold when compared with expression in culture (Tadra-Sfeir *et al.*, 2015). This gene was  
566 also found to be up-regulated in epiphytic *H. seropedicae* colonising wheat and maize (Pankievicz *et*  
567 *al.*, 2016; Balsanelli *et al.*, 2016). Methyl-accepting chemotaxis proteins interact with Che proteins to  
568 detect signals from the environment. Although other T4SS genes were not found perhaps these data  
569 suggest that type IV secretion plays a role in *H-seropedicae*-rice interactions. In the nitrogen-fixing,  
570 endophytic bacterium *Azoarcus* spp., mutation of type IV pilus *pilAB* genes negatively affects  
571 colonisation of rice roots (Dörr *et al.*, 1998).

572 Among the 19 cell-wall related genes, seven were covered at least 2X and an outer-membrane  
573 porin (Hsero\_4295) was induced 28X. Another membrane-protein (Hsero\_0083) of unknown function  
574 was induced 14-fold. These could be proteins that *H. seropedicae* uses to recognise rice.

575

## 576 **Supplementary Data**

577 Table S1 – Oligonucleotides used in this research

578 Table S2 – Genes involved in secondary metabolism and abiotic and biotic stresses  
579 modulated in rice roots colonised with *H. seropedicae*.

580 Table S3 - Differentially expressed genes in rice roots colonised by *H. seropedicae*

581

## 582 **Acknowledgments**

583 We are grateful M.G. Yates for critical reading of the manuscript, Leonardo M. Cruz and  
584 Rodrigo A. Cardoso for bioinformatics support. and Instituto Riograndense do Arroz (IRGA) for

585 providing seeds. We are also thankful to Roseli Prado, Marilza Doroti Lamour and Valter A. Baura for  
586 technical assistance. This work was supported by National Institute of Science and Technology of  
587 Nitrogen Fixation (INCT – Nitrogen Fixation), Council for Scientific and Technological Development  
588 (CNPq) and Coordination of Improvement of Higher-Education Personnel (CAPES). Thanks to CNPq  
589 for doctoral scholarship.

## References

**Aarts N, Metz M, Holub E, Staskawicz BJ, Daniels MJ, Parker JE.** 1998. Different requirements for EDS1 and NDR1 by disease resistance genes define at least two R gene-mediated signaling pathways in Arabidopsis. *Proceedings of the National Academy of Sciences of the United States of America* **95**, 10306–10311.

**Abramovitch RB, Anderson JC, Martin GB.** 2006. Bacterial elicitation and evasion of plant innate immunity. *Nature reviews. Molecular cell biology* **7**, 601–611.

**Adamowski M, Friml J.** 2015. PIN-dependent auxin transport: action, regulation, and evolution. *The Plant Cell* **27**, 20–32.

**Akamatsu A, Wong HL, Fujiwara M, et al.** 2013. An OsCEBiP/OsCERK1-OsRacGEF1-OsRac1 module is an essential early component of chitin-induced rice immunity. *Cell Host & Microbe* **13**, 465–476.

**Alberton D, Müller-Santos M, Brusamarello-Santos LCC, Valdameri G, Cordeiro FA, Yates MG, de Oliveira Pedrosa F, de Souza EM.** 2013. Comparative proteomics analysis of the rice roots colonized by *Herbaspirillum seropedicae* strain SmR1 reveals induction of the methionine recycling in the plant host. *Journal of Proteome Research* **12**, 4757–4768.

**An C, Mou Z.** 2011. Salicylic acid and its function in plant immunity. *Journal of integrative plant biology* **53**, 412–428.

**Anders S, Huber W.** 2010. Differential expression analysis for sequence count data. *Genome biology* **11**, R106.

**Apostol I, Heinsteinst PF, Low PS.** 1989. Rapid Stimulation of an Oxidative Burst during Elicitation of Cultured Plant Cells: Role in Defense and Signal Transduction. *Plant physiology* **90**, 109–116.

**Arredondo-Peter R, Hargrove MS, Sarath G, Moran JF, Lohrman J, Olson JS, Klucas RV.** 1997. Rice hemoglobins. Gene cloning, analysis, and O<sub>2</sub>-binding kinetics of a recombinant protein synthesized in *Escherichia coli*. *Plant physiology* **115**, 1259–1266.

**Aznar A, Chen NWG, Thomine S, Dellagi A.** 2015. Immunity to plant pathogens and iron homeostasis. *Plant Science: An International Journal of Experimental Plant Biology* **240**, 90–97.

**Baldani JL, Baldani VLD, Seldin L, Döbereiner J.** 1986. Characterization of *Herbaspirillum seropedicae* gen. nov., sp. nov., a Root-Associated Nitrogen-Fixing Bacterium. *International Journal of Systematic Bacteriology* **36**, 86–93.

**Balsanelli E, Serrato RV, de Baura VA, Sasaki G, Yates MG, Rigo LU, Pedrosa FO, de Souza EM, Monteiro RA.** 2010. *Herbaspirillum seropedicae* rfbB and rfbC genes are required for maize colonization. *Environmental Microbiology* **12**, 2233–2244.

**Balsanelli E, Tadra-Sfeir MZ, Faoro H, Pankievicz VC, de Baura VA, Pedrosa FO, de Souza EM, Dixon R, Monteiro RA.** 2016. Molecular adaptations of *Herbaspirillum seropedicae* during colonization of the maize rhizosphere. *Environmental Microbiology* **18**, 2343–2356.

**Bartsch M, Gobbato E, Bednarek P, Debey S, Schultze JL, Bautor J, Parker JE.** 2006. Salicylic acid-independent ENHANCED DISEASE SUSCEPTIBILITY1 signaling in *Arabidopsis* immunity and cell death is regulated by the monooxygenase FMO1 and the Nudix hydrolase NUDT7. *The Plant cell* **18**, 1038–1051.

**Bashir K, Inoue H, Nagasaka S, Takahashi M, Nakanishi H, Mori S, Nishizawa NK.** 2006. Cloning and characterization of deoxymugineic acid synthase genes from graminaceous plants. *The Journal of biological chemistry* **281**, 32395–32402.

**Bashir K, Takahashi R, Akhtar S, Ishimaru Y, Nakanishi H, Nishizawa NK.** 2013. The knockdown of OsVIT2 and MIT affects iron localization in rice seed. *Rice (New York, N.Y.)* **6**, 31.

**Bastian F, Cohen A, Piccoli P, Luna V, Baraldi R, Bottini R.** 1998. Production of indole-3-acetic acid and gibberellins A1 and A3 by *Acetobacter diazotrophicus* and *Herbaspirillum seropedicae* in chemically-defined culture media. *Plant Growth Regulation* **24**, 7–11.

**Bindschedler LV, Dewdney J, Blee KA, et al.** 2006. Peroxidase-dependent apoplastic oxidative burst in *Arabidopsis* required for pathogen resistance. *The Plant journal: for cell and molecular biology* **47**, 851–863.

**Boerjan W, Ralph J, Baucher M.** 2003. Lignin Biosynthesis. *Annual Review of Plant Biology* **54**, 519–546.

- Brusamarello-Santos LCC, Pacheco F, Aljanabi SMM, Monteiro RA, Cruz LM, Baura VA, Pedrosa FO, Souza EM, Wassem R.** 2011. Differential gene expression of rice roots inoculated with the diazotroph *Herbaspirillum seropedicae*. *Plant Soil*.
- Burdiak P, Rusaczonok A, Witoń D, Głów D, Karpiński S.** 2015. Cysteine-rich receptor-like kinase CRK5 as a regulator of growth, development, and ultraviolet radiation responses in *Arabidopsis thaliana*. *Journal of Experimental Botany* **66**, 3325–3337.
- Cayrol B, Delteil A, Gobbato E, Kroj T, Morel J-B.** 2016. Three wall-associated kinases required for rice basal immunity form protein complexes in the plasma membrane. *Plant Signaling & Behavior* **11**, e1149676.
- Chen F, Tholl D, Bohlmann J, Pichersky E.** 2011. The family of terpene synthases in plants: a mid-size family of genes for specialized metabolism that is highly diversified throughout the kingdom. *The Plant journal: for cell and molecular biology* **66**, 212–229.
- Choi Y, Choi YD, Lee JS.** 2008. Antimicrobial activity of gamma-thionin-like soybean SE60 in *E. coli* and tobacco plants. *Biochemical and biophysical research communications* **375**, 230–234.
- Chubatsu LS, Monteiro RA, Souza EM de, et al.** 2012. Nitrogen fixation control in *Herbaspirillum seropedicae*. *Plant and Soil* **356**, 197–207.
- Couto D, Zipfel C.** 2016. Regulation of pattern recognition receptor signalling in plants. *Nature Reviews. Immunology* **16**, 537–552.
- Curie C, Panaviene Z, Loulergue C, Dellaporta SL, Briat JF, Walker EL.** 2001. Maize yellow stripe1 encodes a membrane protein directly involved in Fe(III) uptake. *Nature* **409**, 346–349.
- Daudi A, Cheng Z, O'Brien JA, Mammarella N, Khan S, Ausubel FM, Bolwell GP.** 2012. The apoplastic oxidative burst peroxidase in *Arabidopsis* is a major component of pattern-triggered immunity. *The Plant cell* **24**, 275–287.
- Delteil A, Gobbato E, Cayrol B, Estevan J, Michel-Romiti C, Dievart A, Kroj T, Morel J-B.** 2016. Several wall-associated kinases participate positively and negatively in basal defense against rice blast fungus. *BMC plant biology* **16**, 17.
- Dietz K-J, Jacob S, Oelze M-L, Laxa M, Tognetti V, de Miranda SMN, Baier M, Finkemeier I.** 2006. The function of peroxiredoxins in plant organelle redox metabolism. *Journal of experimental botany* **57**, 1697–1709.
- Dobereiner J, Baldani VLD, Baldani JI.** 1995. *Como isolar e identificar bactérias diazotróficas de plantas não-leguminosas*. Brasília: EMBRAPA.

**Dörr J, Hurek T, Reinhold-Hurek B.** 1998. Type IV pili are involved in plant-microbe and fungus-microbe interactions. *Molecular microbiology* **30**, 7–17.

**Drogue B, Sanguin H, Chamam A, Mozar M, Llauro C, Panaud O, Prigent-Combaret C, Picault N, Wisniewski-Dyé F.** 2014. Plant root transcriptome profiling reveals a strain-dependent response during *Azospirillum*-rice cooperation. *Frontiers in Plant Science* **5**, 607.

**Elbeltagy A, Nishioka K, Sato T, Suzuki H, Ye B, Hamada T, Isawa T, Mitsui H, Minamisawa K.** 2001. Endophytic colonization and in planta nitrogen fixation by a *Herbaspirillum* sp. isolated from wild rice species. *Applied and environmental microbiology* **67**, 5285–5293.

**Eulgem T, Somssich IE.** 2007. Networks of WRKY transcription factors in defense signaling. *Current opinion in plant biology* **10**, 366–371.

**Falk A, Feys BJ, Frost LN, Jones JDG, Daniels MJ, Parker JE.** 1999. EDS1, an essential component of R gene-mediated disease resistance in *Arabidopsis* has homology to eukaryotic lipases. *Proceedings of the National Academy of Sciences of the United States of America* **96**, 3292–3297.

**Ferrer J-L, Austin MB, Stewart C Jr, Noel JP.** 2008. Structure and function of enzymes involved in the biosynthesis of phenylpropanoids. *Plant physiology and biochemistry: PPB / Société française de physiologie végétale* **46**, 356–370.

**Florack DEA, Stiekema W.J.** 1994. Thionins: properties, possible biological roles and mechanisms of action. *Plant Molecular Biology* **26**, 25–37.

**Giordano W, Hirsch AM.** 2004. The expression of MaEXP1, a *Melilotus alba* expansin gene, is upregulated during the sweetclover-*Sinorhizobium meliloti* interaction. *Molecular plant-microbe interactions: MPMI* **17**, 613–622.

**Glazebrook J.** 2005. Contrasting mechanisms of defense against biotrophic and necrotrophic pathogens. *Annual review of phytopathology* **43**, 205–227.

**Goujon T, Minic Z, El Amrani A, Lerouxel O, Aletti E, Lapierre C, Joseleau J-P, Jouanin L.** 2003. AtBXL1, a novel higher plant (*Arabidopsis thaliana*) putative beta-xylosidase gene, is involved in secondary cell wall metabolism and plant development. *The Plant Journal: For Cell and Molecular Biology* **33**, 677–690.

**Guilfoyle TJ.** 2015. The PB1 domain in auxin response factor and Aux/IAA proteins: a versatile protein interaction module in the auxin response. *The Plant Cell* **27**, 33–43.

**Gyaneshwar P, James EK, Reddy PM, Ladha JK.** 2002. Blackwell Science Ltd  
Herbaspirillum colonization increases growth and nitrogen accumulation in aluminium-tolerant rice varieties. *New Phytologist* **154**, 131–145.

**Hakoyama T, Watanabe H, Tomita J, Yamamoto A, Sato S, Mori Y, Kouchi H, Suganuma N.** 2009. Nicotianamine synthase specifically expressed in root nodules of *Lotus japonicus*. *Planta* **230**, 309–317.

**Harkenrider M, Sharma R, De Vleeschauwer D, Tsao L, Zhang X, Chern M, Canlas P, Zuo S, Ronald PC.** 2016. Overexpression of Rice Wall-Associated Kinase 25 (OsWAK25) Alters Resistance to Bacterial and Fungal Pathogens. *PloS One* **11**, e0147310.

**Hassan S, Mathesius U.** 2012. The role of flavonoids in root–rhizosphere signalling: opportunities and challenges for improving plant–microbe interactions. *Journal of Experimental Botany*.

**Higuchi K, Suzuki K, Nakanishi H, Yamaguchi H, Nishizawa NK, Mori S.** 1999. Cloning of nicotianamine synthase genes, novel genes involved in the biosynthesis of phytosiderophores. *Plant physiology* **119**, 471–480.

**Hoagland D, Arnon D.** 1950. *The water-culture method for growing plants without soil*. California.

**Hu Y, Dong Q, Yu D.** 2012. Arabidopsis WRKY46 coordinates with WRKY70 and WRKY53 in basal resistance against pathogen *Pseudomonas syringae*. *Plant science: an international journal of experimental plant biology* **185–186**, 288–297.

**Hynes NE, MacDonald G.** 2009. ErbB receptors and signaling pathways in cancer. *Current Opinion in Cell Biology* **21**, 177–184.

**Inoue H, Kobayashi T, Nozoye T, Takahashi M, Kakei Y, Suzuki K, Nakazono M, Nakanishi H, Mori S, Nishizawa NK.** 2009. Rice OsYSL15 is an iron-regulated iron(III)-deoxymugineic acid transporter expressed in the roots and is essential for iron uptake in early growth of the seedlings. *The Journal of biological chemistry* **284**, 3470–3479.

**Inoue H, Takahashi M, Kobayashi T, Suzuki M, Nakanishi H, Mori S, Nishizawa NK.** 2008. Identification and localisation of the rice nicotianamine aminotransferase gene OsNAAT1 expression suggests the site of phytosiderophore synthesis in rice. *Plant molecular biology* **66**, 193–203.

**Inukai Y, Sakamoto T, Ueguchi-Tanaka M, Shibata Y, Gomi K, Umemura I, Hasegawa Y, Ashikari M, Kitano H, Matsuoka M.** 2005. Crown rootless1, which is essential for crown root formation in rice, is a target of an AUXIN RESPONSE FACTOR in auxin signaling. *The Plant cell* **17**, 1387–1396.



**Ishimaru Y, Masuda H, Bashir K, et al.** 2010. Rice metal-nicotianamine transporter, OsYSL2, is required for the long-distance transport of iron and manganese. *The Plant journal: for cell and molecular biology* **62**, 379–390.

**Ishimaru Y, Suzuki M, Tsukamoto T, et al.** 2006. Rice plants take up iron as an Fe<sup>3+</sup>-phytosiderophore and as Fe<sup>2+</sup>. *The Plant journal: for cell and molecular biology* **45**, 335–346.

**Iwai T, Kaku H, Honkura R, Nakamura S, Ochiai H, Sasaki T, Ohashi Y.** 2002. Enhanced resistance to seed-transmitted bacterial diseases in transgenic rice plants overproducing an oat cell-wall-bound thionin. *Molecular plant-microbe interactions: MPMI* **15**, 515–521.

**Jain M, Nijhawan A, Tyagi AK, Khurana JP.** 2006. Validation of housekeeping genes as internal control for studying gene expression in rice by quantitative real-time PCR. *Biochemical and Biophysical Research Communications* **345**, 646–651.

**James EK.** 2000. Nitrogen fixation in endophytic and associative symbiosis. *Field Crops Research* **65**, 197–209.

**James EK, Gyaneshwar P, Mathan N, Barraquio WL, Reddy PM, Iannetta PPM, Olivares FL, Ladha JK.** 2002. Infection and colonization of rice seedlings by the plant growth-promoting bacterium *Herbaspirillum seropedicae* Z67. *Molecular plant-microbe interactions: MPMI* **15**, 894–906.

**Jameson P.** 2000. Cytokinins and auxins in plant-pathogen interactions – An overview. *Plant Growth Regulation* **32**, 369–380.

**Ji H, Gheysen G, Ullah C, Verbeek R, Shang C, De Vleeschauwer D, Höfte M, Kyndt T.** 2015. The role of thionins in rice defence against root pathogens. *Molecular Plant Pathology* **16**, 870–881.

**Jones JDG, Dangl JL.** 2006. The plant immune system. *Nature* **444**, 323–329.

**Journot-Catalino N, Somssich IE, Roby D, Kroj T.** 2006. The transcription factors WRKY11 and WRKY17 act as negative regulators of basal resistance in *Arabidopsis thaliana*. *The Plant cell* **18**, 3289–3302.

**Kakei Y, Ishimaru Y, Kobayashi T, Yamakawa T, Nakanishi H, Nishizawa NK.** 2012. OsYSL16 plays a role in the allocation of iron. *Plant molecular biology* **79**, 583–594.

**Kawahara Y, Oono Y, Kanamori H, Matsumoto T, Itoh T, Minami E.** 2012. Simultaneous RNA-Seq Analysis of a Mixed Transcriptome of Rice and Blast Fungus Interaction. *PLoS one* **7**, e49423.

- Kawasaki T, Henmi K, Ono E, Hatakeyama S, Iwano M, Satoh H, Shimamoto K.** 1999. The small GTP-binding protein Rac is a regulator of cell death in plants. *Proceedings of the National Academy of Sciences of the United States of America* **96**, 10922–10926.
- Kawasaki T, Koita H, Nakatsubo T, Hasegawa K, Wakabayashi K, Takahashi H, Umemura K, Umezawa T, Shimamoto K.** 2006. Cinnamoyl-CoA reductase, a key enzyme in lignin biosynthesis, is an effector of small GTPase Rac in defense signaling in rice. *Proceedings of the National Academy of Sciences of the United States of America* **103**, 230–235.
- Kazan K, Manners JM.** 2009. Linking development to defense: auxin in plant-pathogen interactions. *Trends in plant science* **14**, 373–382.
- Kim ST, Kim SG, Kang YH, Wang Y, Kim J-Y, Yi N, Kim J-K, Rakwal R, Koh H-J, Kang KY.** 2008. Proteomics analysis of rice lesion mimic mutant (*spl1*) reveals tightly localized probenazole-induced protein (PBZ1) in cells undergoing programmed cell death. *Journal of proteome research* **7**, 1750–1760.
- Klassen G, Pedrosa FO, Souza EM, Funayama S, Rigo L.** 1997. Effect of nitrogen compounds on nitrogenase activity in *Herbaspirillum seropedicae*. *Canadian Journal of Microbiology* **43**, 887–891.
- Kohorn BD.** 2015. The state of cell wall pectin monitored by wall associated kinases: A model. *Plant Signaling & Behavior* **10**, e1035854.
- Kohorn BD.** 2016. Cell wall-associated kinases and pectin perception. *Journal of Experimental Botany* **67**, 489–494.
- Kohorn BD, Kohorn SL.** 2012. The cell wall-associated kinases, WAKs, as pectin receptors. *Frontiers in Plant Science* **3**.
- Kwasniewski M, Szarejko I.** 2006. Molecular cloning and characterization of beta-expansin gene related to root hair formation in barley. *Plant Physiology* **141**, 1149–1158.
- Ladha JK, Reddy PM.** 2003. Nitrogen fixation in rice systems: state of knowledge and future prospects. *Plant and Soil* **252**, 151–167.
- Lee S, Jeon US, Lee SJ, et al.** 2009. Iron fortification of rice seeds through activation of the nicotianamine synthase gene. *Proceedings of the National Academy of Sciences* **106**, 22014–22019.
- Li H, Zhou S-Y, Zhao W-S, Su S-C, Peng Y-L.** 2009. A novel wall-associated receptor-like protein kinase gene, OsWAK1, plays important roles in rice blast disease resistance. *Plant Molecular Biology* **69**, 337–346.

**Lin C, Choi H-S, Cho H-T.** 2011. Root hair-specific EXPANSIN A7 is required for root hair elongation in Arabidopsis. *Molecules and cells* **31**, 393–397.

**Ling HQ, Pich A, Scholz G, Ganal MW.** 1996. Genetic analysis of two tomato mutants affected in the regulation of iron metabolism. *Molecular & general genetics: MGG* **252**, 87–92.

**Lira-Ruan V, Sarath G, Klucas RV, Arredondo-Peter R.** 2001. Synthesis of hemoglobins in rice (*Oryza sativa* var. Jackson) plants growing in normal and stress conditions. *Plant Science* **161**, 279–287.

**Lohse M, Bolger AM, Nagel A, Fernie AR, Lunn JE, Stitt M, Usadel B.** 2012. RobiNA: a user-friendly, integrated software solution for RNA-Seq-based transcriptomics. *Nucleic Acids Research* **40**, W622-627.

**Lorbiecke R, Sauter M.** 1999. Adventitious Root Growth and Cell-Cycle Induction in Deepwater Rice. *Plant Physiology* **119**, 21–30.

**Magbanua ZV, Arick M, Buza T, Hsu C-Y, Showmaker KC, Chouvarine P, Deng P, Peterson DG, Lu S.** 2014. Transcriptomic dissection of the rice – *Burkholderia glumae* interaction. *BMC Genomics* **15**.

**McDowell JM, Simon SA.** 2008. Molecular diversity at the plant-pathogen interface. *Developmental and comparative immunology* **32**, 736–744.

**McHale L, Tan X, Koehl P, Michelmore RW.** 2006. Plant NBS-LRR proteins: adaptable guards. *Genome biology* **7**, 212.

**McSteen P.** 2010. Auxin and Monocot Development. *Cold Spring Harbor Perspectives in Biology* **2**.

**Meier S, Ruzvidzo O, Morse M, Donaldson L, Kwezi L, Gehring C.** 2010. The Arabidopsis wall associated kinase-like 10 gene encodes a functional guanylyl cyclase and is co-expressed with pathogen defense related genes. *PloS one* **5**, e8904.

**Mizuno H, Kawahara Y, Sakai H, et al.** 2010. Massive parallel sequencing of mRNA in identification of unannotated salinity stress-inducible transcripts in rice (*Oryza sativa* L.). *BMC genomics* **11**, 683.

**Monteiro RA, Balsanelli E, Wasseem R, et al.** 2012. Herbaspirillum-plant interactions: microscopical, histological and molecular aspects. *Plant and Soil* **356**, 175–196.

**Muramoto N, Tanaka T, Shimamura T, Mitsukawa N, Hori E, Koda K, Otani M, Hirai M, Nakamura K, Imaeda T.** 2012. Transgenic sweet potato expressing thionin from barley

gives resistance to black rot disease caused by *Ceratocystis fimbriata* in leaves and storage roots. *Plant cell reports* **31**, 987–997.

**Naoumkina MA, Zhao Q, Gallego-Giraldo L, Dai X, Zhao PX, Dixon RA.** 2010. Genome-wide analysis of phenylpropanoid defence pathways. *Molecular plant pathology* **11**, 829–846.

**Narsai R, Ivanova A, Ng S, Whelan J.** 2010. Defining reference genes in *Oryza sativa* using organ, development, biotic and abiotic transcriptome datasets. *BMC Plant Biology* **10**, 56.

**Navarro L, Dunoyer P, Jay F, Arnold B, Dharmasiri N, Estelle M, Voinnet O, Jones JDG.** 2006. A plant miRNA contributes to antibacterial resistance by repressing auxin signaling. *Science (New York, N.Y.)* **312**, 436–439.

**Nobuta K, Venu RC, Lu C, et al.** 2007. An expression atlas of rice mRNAs and small RNAs. *Nature biotechnology* **25**, 473–477.

**Nozoye T, Nagasaka S, Kobayashi T, Takahashi M, Sato Y, Sato Y, Uozumi N, Nakanishi H, Nishizawa NK.** 2011. Phytosiderophore efflux transporters are crucial for iron acquisition in graminaceous plants. *The Journal of biological chemistry* **286**, 5446–5454.

**Okada A, Shimizu T, Okada K, Kuzuyama T, Koga J, Shibuya N, Nojiri H, Yamane H.** 2007. Elicitor induced activation of the methylerythritol phosphate pathway toward phytoalexins biosynthesis in rice. *Plant molecular biology* **65**, 177–187.

**Ono E, Wong HL, Kawasaki T, Hasegawa M, Kodama O, Shimamoto K.** 2001. Essential role of the small GTPase Rac in disease resistance of rice. *Proceedings of the National Academy of Sciences* **98**, 759–764.

**Pankievicz VCS, do Amaral FP, Santos KFDN, et al.** 2015. Robust biological nitrogen fixation in a model grass-bacterial association. *The Plant Journal: For Cell and Molecular Biology* **81**, 907–919.

**Pankievicz VCS, Camilios-Neto D, Bonato P, et al.** 2016. RNA-seq transcriptional profiling of *Herbaspirillum seropedicae* colonizing wheat (*Triticum aestivum*) roots. *Plant Molecular Biology* **90**, 589–603.

**Park S-W, Kaimoyo E, Kumar D, Mosher S, Klessig DF.** 2007. Methyl salicylate is a critical mobile signal for plant systemic acquired resistance. *Science (New York, N.Y.)* **318**, 113–116.

**Parker JE, Holub EB, Frost LN, Falk A, Gunn ND, Daniels MJ.** 1996. Characterization of *eds1*, a mutation in *Arabidopsis* suppressing resistance to *Peronospora parasitica* specified by several different RPP genes. *The Plant Cell Online* **8**, 2033–2046.

- Pedrosa FO, Monteiro RA, Wassem R, et al.** 2011. Genome of *Herbaspirillum seropedicae* strain SmR1, a specialized diazotrophic endophyte of tropical grasses. *PLoS genetics* **7**, e1002064.
- Pfaffl MW.** 2001. A new mathematical model for relative quantification in real-time RT-PCR. *Nucleic Acids Research* **29**, e45.
- Plaper A, Golob M, Hafner I, Oblak M, Solmajer T, Jerala R.** 2003. Characterization of quercetin binding site on DNA gyrase. *Biochemical and biophysical research communications* **306**, 530–536.
- Rhee SG, Chae HZ, Kim K.** 2005. Peroxiredoxins: a historical overview and speculative preview of novel mechanisms and emerging concepts in cell signaling. *Free radical biology & medicine* **38**, 1543–1552.
- Robert-Seilaniantz A, Grant M, Jones JDG.** 2011. Hormone crosstalk in plant disease and defense: more than just jasmonate-salicylate antagonism. *Annual review of phytopathology* **49**, 317–343.
- Rogg LE, Bartel B.** 2001. Auxin signaling: derepression through regulated proteolysis. *Developmental cell* **1**, 595–604.
- Roncato-Maccari LDB, Ramos HJO, Pedrosa FO, Alquini Y, Chubatsu LS, Yates MG, Rigo LU, Steffens MBR, Souza EM.** 2003. Endophytic *Herbaspirillum seropedicae* expresses *nif* genes in gramineous plants. *FEMS microbiology ecology* **45**, 39–47.
- Ross JR, Nam KH, D’Auria JC, Pichersky E.** 1999. S-Adenosyl-L-methionine:salicylic acid carboxyl methyltransferase, an enzyme involved in floral scent production and plant defense, represents a new class of plant methyltransferases. *Archives of biochemistry and biophysics* **367**, 9–16.
- Sasaki K, Ikeda S, Eda S, et al.** 2010. Impact of plant genotype and nitrogen level on rice growth response to inoculation with *Azospirillum* sp. strain B510 under paddy field conditions. *Soil Science and Plant Nutrition* **56**, 636–644.
- Shankar R, Bhattacharjee A, Jain M.** 2016. Transcriptome analysis in different rice cultivars provides novel insights into desiccation and salinity stress responses. *Scientific Reports* **6**, 23719.
- Shojima S, Nishizawa NK, Fushiya S, Nozoe S, Irifune T, Mori S.** 1990. Biosynthesis of Phytosiderophores: In Vitro Biosynthesis of 2'-Deoxymugineic Acid from L-Methionine and Nicotianamine. *Plant physiology* **93**, 1497–1503.

**Souza ALF, Invitti AL, Rego FGM, Monteiro RA, Klassen G, Souza EM, Chubatsu LS, Pedrosa FO, Rigo LU.** 2010. The involvement of the nif-associated ferredoxin-like genes *fdxA* and *fdxN* of *Herbaspirillum seropedicae* in nitrogen fixation. *Journal of microbiology* (Seoul, Korea) **48**, 77–83.

**Souza EM, Pedrosa FO, Rigo LU, Machado HB, Yates MG.** 2000. Expression of the *nifA* gene of *Herbaspirillum seropedicae*: role of the NtrC and NifA binding sites and of the -24/-12 promoter element. *Microbiology* (Reading, England) **146** ( Pt 6), 1407–1418.

**Straub D, Yang H, Liu Y, Tsap T, Ludewig U.** 2013. Root ethylene signalling is involved in *Miscanthus sinensis* growth promotion by the bacterial endophyte *Herbaspirillum frisingense* GSF30(T). *Journal of Experimental Botany* **64**, 4603–4615.

**Suharsono U, Fujisawa Y, Kawasaki T, Iwasaki Y, Satoh H, Shimamoto K.** 2002. The heterotrimeric G protein alpha subunit acts upstream of the small GTPase Rac in disease resistance of rice. *Proceedings of the National Academy of Sciences of the United States of America* **99**, 13307–13312.

**Tadra-Sfeir MZ, Faoro H, Camilios-Neto D, et al.** 2015. Genome wide transcriptional profiling of *Herbaspirillum seropedicae* SmR1 grown in the presence of naringenin. *Frontiers in Microbiology* **6**, 491.

**Thomine S, Lelièvre F, Debarbieux E, Schroeder JI, Barbier-Brygoo H.** 2003. AtNRAMP3, a multispecific vacuolar metal transporter involved in plant responses to iron deficiency. *The Plant Journal* **34**, 685–695.

**Valdameri G, Alberton D, Moure VR, Kokot TB, Kukulj C, Brusamarello-Santos LCC, Monteiro RA, Pedrosa F de O, de Souza EM.** 2017. *Herbaspirillum rubrisubalbicans*, a mild pathogen impairs growth of rice by augmenting ethylene levels. *Plant Molecular Biology* **94**, 625–640.

**Vandesompele J, De Preter K, Pattyn F, Poppe B, Van Roy N, De Paepe A, Speleman F.** 2002. Accurate normalization of real-time quantitative RT-PCR data by geometric averaging of multiple internal control genes. *Genome Biology* **3**, research0034.1-research0034.11.

**Vanholme R, Demedts B, Morreel K, Ralph J, Boerjan W.** 2010. Lignin Biosynthesis and Structure. *Plant Physiology* **153**, 895–905.

**Venugopal SC, Jeong R-D, Mandal MK, et al.** 2009. Enhanced disease susceptibility 1 and salicylic acid act redundantly to regulate resistance gene-mediated signaling. *PLoS genetics* **5**, e1000545.

- Vinagre F, Vargas C, Schwarcz K, Cavalcante J, Nogueira EM, Baldani JI, Ferreira PCG, Hemerly AS.** 2006. SHR5: a novel plant receptor kinase involved in plant-N<sub>2</sub>-fixing endophytic bacteria association. *Journal of experimental botany* **57**, 559–569.
- Vlot AC, Dempsey DA, Klessig DF.** 2009. Salicylic Acid, a Multifaceted Hormone to Combat Disease. *Annual Review of Phytopathology* **47**, 177–206.
- Vranová E, Coman D, Gruissem W.** 2013. Network Analysis of the MVA and MEP Pathways for Isoprenoid Synthesis. *Annual review of plant biology*.
- Wakasa Y, Oono Y, Yazawa T, Hayashi S, Ozawa K, Handa H, Matsumoto T, Takaiwa F.** 2014. RNA sequencing-mediated transcriptome analysis of rice plants in endoplasmic reticulum stress conditions. *BMC Plant Biology* **14**, 101.
- Wang S, Wu H, Qiao J, Ma L, Liu J, Xia Y, Gao X.** 2009. Molecular mechanism of plant growth promotion and induced systemic resistance to tobacco mosaic virus by *Bacillus* spp. *Journal of microbiology and biotechnology* **19**, 1250–1258.
- Xu H, Gao Y, Wang J.** 2012. Transcriptomic analysis of rice (*Oryza sativa*) developing embryos using the RNA-Seq technique. *PloS one* **7**, e30646.
- Xu X-H, Wang C, Li S-X, et al.** 2015. Friend or foe: differential responses of rice to invasion by mutualistic or pathogenic fungi revealed by RNAseq and metabolite profiling. *Scientific Reports* **5**.
- Zhang Y, Xu Y-H, Yi H-Y, Gong J-M.** 2012. Vacuolar membrane transporters OsVIT1 and OsVIT2 modulate iron translocation between flag leaves and seeds in rice. *The Plant Journal: For Cell and Molecular Biology* **72**, 400–410.
- ZhiMing Y, Bo K, XiaoWei H, ShaoLei L, YouHuang B, WoNa D, Ming C, Hyung-Taeg C, Ping W.** 2011. Root hair-specific expansins modulate root hair elongation in rice. *The Plant journal: for cell and molecular biology* **66**, 725–734.

Table 1 – Statistics of RNA-seq reads mapping

|                                                                   | <b>Control</b>       | <b>Inoculated</b> |
|-------------------------------------------------------------------|----------------------|-------------------|
| <b>Total number of reads</b>                                      | 101,587,721          | 59,591,404        |
| <b>Total number of reads after trimming</b>                       | 65,099,320           | 38,463,798        |
| <b>Reads uniquely mapped to RGAP7 (%)</b>                         | 12,255,809<br>(18.8) | 9,919,863 (25.8)  |
| <b>Reads mapped uniquely to the rice mitochondrial genome (%)</b> | 626,587 (0.96)       | 253,771 (0.66)    |
| <b>Reads mapped uniquely to the rice chloroplast genome (%)</b>   | 102,730 (0.16)       | 36,915 (0.09)     |
| <b>Total number of reads mapped to rice rRNA (%)</b>              | 41,744,369<br>(64.1) | 26,875,340 (69.9) |
| <b>Reads mapped to SmR1 genome (%)</b>                            |                      | 16,878 (0.04)     |
| <b>Total number of reads mapped (%)</b>                           | 54,803,125<br>(84.2) | 32,813,183 (85.3) |
| <b>Unmapped reads (%)</b>                                         | 10,296,195<br>(15.8) | 5,650,615 (14.7)  |



Table 2 – Rice genes modulated by colonisation with *H. seropedicae* that are involved in phyto-hormone signalling and the MTA cycle

| <b>Gene ID</b>          | <b>Gene product/description*</b>                                                                                   | <b>Fold-change</b> | <b>Pvalue</b> |
|-------------------------|--------------------------------------------------------------------------------------------------------------------|--------------------|---------------|
| <b>LOC_Os01g67030.1</b> | Auxin-responsive protein, putative, expressed                                                                      | 2.5                | 4.99E-06      |
| <b>LOC_Os08g24790.1</b> | AIR12, putative, expressed                                                                                         | 0.49               | 0.04          |
| <b>LOC_Os09g25770.1</b> | Auxin-induced protein 5NG4, putative, expressed                                                                    | 0.55               | 0.01          |
| <b>LOC_Os05g01570.1</b> | Auxin-induced protein 5NG4, putative, expressed                                                                    | 0.40               | 0.05          |
| <b>LOC_Os09g28050.1</b> | 1-aminocyclopropane-1-carboxylate synthase family protein (ACC synthase) (RAPDB)                                   | 6.1                | 2.11E-54      |
|                         | Asparate aminotransferase (MSU)                                                                                    |                    |               |
| <b>LOC_Os03g63900.1</b> | 1-aminocyclopropane-1-carboxylate oxidase 2 (ACC oxidase)                                                          | 0.50               | 7.88E-04      |
| <b>LOC_Os01g04800.1</b> | B3 DNA binding domain containing protein (MSU)<br>APETALA2/ethylene-responsive element binding protein 129 (RAPDB) | 2.2                | 3.67E-03      |
| <b>LOC_Os06g02220.1</b> | MTA/SAH nucleosidase                                                                                               | 2.6                | 1.83E-11      |

|                         |                                                      |      |          |
|-------------------------|------------------------------------------------------|------|----------|
| <b>LOC_Os04g57400.1</b> | Methylthioribose kinase                              | 6.1  | 3.20E-18 |
| <b>LOC_Os04g57410.1</b> | Methylthioribose kinase                              | 10.2 | 1.16E-12 |
| <b>LOC_Os06g04510.1</b> | Similar to enolase 1                                 | 1.9  | 0.03     |
| <b>LOC_Os03g06620.1</b> | 1,2-dihydroxy-3-keto-5-methylthiopentene dioxygenase | 7.5  | 5.94E-65 |
| <b>LOC_Os10g28360.1</b> | 1,2-dihydroxy-3-keto-5-methylthiopentene dioxygenase | 0.47 | 6.14E-03 |
| <b>LOC_Os01g22010.3</b> | S-adenosylmethionine synthetase (SAM)                | 1.9  | 1.72E-05 |

\* Gene product name/description of the both rice database were used: MSU (Rice Genome Annotation Project) and RAPDB (The Rice Annotation Project).

Table 3 – Rice genes highly regulated (fold change > 10) by inoculation with *H. seropedicae*

| Gene ID                        | Gene product/description*                                                                            | Fold change | P-value   |
|--------------------------------|------------------------------------------------------------------------------------------------------|-------------|-----------|
| <b>Up-regulated rice genes</b> |                                                                                                      |             |           |
| <b>LOC_Os02g20360.1</b>        | Ttyrosine aminotransferase, putative, expressed, Similar to Nicotianamine aminotransferase A (RAPDB) | 10          | 5.24E-30  |
| <b>LOC_Os04g57410.1</b>        | Methylthioribose kinase. putative. Expressed                                                         | 10.2        | 1.16E-12  |
| <b>LOC_Os03g26210.1</b>        | Helix-loop-helix DNA-binding domain containing protein. Expressed                                    | 12.6        | 4.10E-09  |
| <b>LOC_Os01g72370.1</b>        | Helix-loop-helix DNA-binding domain containing protein. Expressed                                    | 16.4        | 3.36E-74  |
| <b>LOC_Os11g15624.1</b>        | Expressed protein                                                                                    | 17.7        | 1.22E-25  |
| <b>LOC_Os03g13390.2</b>        | Oxidoreductase. aldo/keto reductase family protein. putative. Expressed                              | 19.4        | 1.61E-10  |
| <b>LOC_Os02g43410.1</b>        | Transposon protein. putative. unclassified. Expressed                                                | 21          | 3.97E-81  |
| <b>LOC_Os10g11889.2</b>        | Expressed protein                                                                                    | 23          | 3.29E-113 |
| <b>LOC_Os01g65110.1</b>        | POT family protein. Expressed                                                                        | 26          | 6.63E-14  |
| <b>LOC_Os07g15460.1</b>        | Metal transporter Nramp6. putative. Expressed                                                        | 27          | 3.56E-61  |
| <b>LOC_Os03g03724.1</b>        | Expressed protein                                                                                    | 28          | 0.02      |
| <b>LOC_Os03g19427.1</b>        | Nicotianamine synthase. putative. expressed                                                          | 32          | 1.02E-22  |
| <b>LOC_Os03g46454.1</b>        | Metal cation transporter. putative.                                                                  | 34          | 4.02E-08  |

| expressed               |                                                                                    |      |          |
|-------------------------|------------------------------------------------------------------------------------|------|----------|
| <b>LOC_Os06g19095.1</b> | Expressed protein                                                                  | 40   | 1.51E-14 |
| <b>LOC_Os11g04020.1</b> | Major facilitator superfamily antiporter.<br>putative. expressed                   | 40   | 8.84E-51 |
| <b>LOC_Os03g19420.2</b> | Nicotianamine synthase. putative.<br>expressed                                     | 52   | 5.57E-80 |
| <b>LOC_Os12g18410.1</b> | Expressed protein                                                                  | 70   | 2.07E-05 |
| <b>LOC_Os03g12510.1</b> | Non-symbiotic hemoglobin 2. putative.<br>expressed                                 | 104  | 5.58E-24 |
| <b>LOC_Os04g51660.1</b> | Transferase family protein, putative,<br>expressed                                 | 0.08 | 2.79E-03 |
| <b>LOC_Os04g59020.1</b> | Integral membrane protein, putative,<br>expressed                                  | 0.08 | 3.41E-03 |
| <b>LOC_Os09g23300.1</b> | Integral membrane protein, putative,<br>expressed                                  | 0.06 | 3.63E-05 |
| <b>LOC_Os11g15340.2</b> | SAM dependent carboxyl<br>methyltransferase family<br>protein, putative, expressed | 0.03 | 1.54E-03 |
| <b>LOC_Os01g55690.1</b> | Glutelin, putative, expressed                                                      | 0.02 | 0.02     |
| <b>LOC_Os12g38040.1</b> | Metallothionein family protein,<br>expressed                                       | 0.02 | 3.72E-22 |
| <b>LOC_Os10g07556.1</b> | Wall-associated receptor kinase-like 22<br>precursor, putative, expressed          | 0.01 | 5.22E-08 |

\* Gene product name/description of the both rice database were used: MSU (Rice Genome Annotation Project) and RAPDB (The Rice Annotation Project).

Table 4: Differentially expressed genes in rice roots colonised by *H. seropedicae* involved in uptake and transport of metals

| <b>ID</b>        | <b>Gene product/description*</b>                                                                                                                                                  | <b>Fold change</b> | <b>p-value</b> |
|------------------|-----------------------------------------------------------------------------------------------------------------------------------------------------------------------------------|--------------------|----------------|
| LOC_Os01g22010.3 | S-adenosylmethionine synthetase, putative, expressed                                                                                                                              | 1.9                | 1.72E-05       |
| LOC_Os03g19427.1 | Nicotianamine synthase. putative. expressed                                                                                                                                       | 32                 | 1.02E-22       |
| LOC_Os03g19420.2 | Nicotianamine synthase. putative. expressed                                                                                                                                       | 52                 | 5.57E-80       |
| LOC_Os02g20360.1 | tyrosine aminotransferase, putative, expressed (MSU), Similar to Nicotianamine aminotransferase (RAPDB)                                                                           | 10                 | 5.24E-30       |
| LOC_Os03g13390.2 | Oxidoreductase. aldo/keto reductase family protein. putative. Expressed (MSU)<br>Similar to NADPH-dependent codeinone reductase, gene name: deoxymugineic acid synthase 1 (RAPDB) | 19.4               | 1.61E-10       |
| LOC_Os11g04020.1 | Major facilitator superfamily antiporter, putative, expressed (TOM1)                                                                                                              | 40                 | 8.84E-51       |
| LOC_Os11g05390.1 | Transporter, major facilitator family, putative, expressed (ENA1)                                                                                                                 | 3.1                | 5.80E-03       |
| LOC_Os03g46470.1 | Metal cation transporter, putative, expressed (OsIRT1)                                                                                                                            | 4.3                | 4.09E-14       |
| LOC_Os03g46454.1 | Metal cation transporter, putative,                                                                                                                                               | 34                 | 4,02E-         |

|                  | expressed (OsIRT2)                                                                                                                                                                                                                        |     | 08           |
|------------------|-------------------------------------------------------------------------------------------------------------------------------------------------------------------------------------------------------------------------------------------|-----|--------------|
| LOC_Os04g45900.1 | Transposon protein, putative,<br>unclassified, expressed (MSU)<br>Similar to Metal-nicotianamine<br>transporter YSL2, Gene symbol<br>synonym: OsYSL16 (RAPDB)                                                                             | 3.2 | 1.23E-<br>07 |
| LOC_Os02g43410.1 | Transposon protein. putative.<br>unclassified. Expressed (MSU)<br>Iron-phytosiderophore transporter,<br>Iron homeostasis (Os02t0650300-<br>01); Similar to Iron-<br>phytosiderophore transporter<br>YSL15. (Os02t0650300-02) (RAP-<br>DB) | 21  | 3.97E-<br>81 |
| LOC_Os07g15460.1 | Metal transporter Nramp6. putative.<br>Expressed                                                                                                                                                                                          | 27  | 3.56E-<br>61 |

\* Gene product name/description of the both rice database were used: MSU (Rice Genome Annotation Project) and RAPDB (The Rice Annotation Project).

Table 5 – ORFs of *H. seropedicae* expressed following contact with rice roots

| ID                  | Fold Change | p-value  | ID Feature | Description                                                                                                                  | COG                                                                                 |
|---------------------|-------------|----------|------------|------------------------------------------------------------------------------------------------------------------------------|-------------------------------------------------------------------------------------|
| <b>Hsero_3499</b>   | 0.4         | 7.0E-04  | qor        | qor<br>NADPH:quinone<br>oxidoreductase<br>protein<br>4007887:4008915<br>forward                                              | C;R - Energy<br>production and<br>conversion;General<br>function prediction<br>only |
| <b>Hsero_1gy130</b> | 30          | 6.20E-03 | Hsero_1130 | Hsero_1130 ABC-<br>type dipeptide<br>transporter,<br>periplasmic<br>peptide-binding<br>protein<br>1287409:1289031<br>forward | E - Amino acid<br>transport and<br>metabolism                                       |
| <b>Hsero_4713</b>   | 27          | 7.70E-03 | urtA       | urtA ABC-type urea<br>transport system,<br>periplasmic<br>component protein<br>5407999:5409252<br>forward                    | E - Amino acid<br>transport and<br>metabolism                                       |
| <b>Hsero_0084</b>   | 43          | 0.02     | glnK       | glnK nitrogen<br>regulatory PII-like<br>protein<br>99052:99390<br>forward                                                    | E - Amino acid<br>transport and<br>metabolism                                       |



|                   |     |         |            |                                                                             |                                                                  |
|-------------------|-----|---------|------------|-----------------------------------------------------------------------------|------------------------------------------------------------------|
| <b>Hsero_1469</b> | 0.2 | 2.0E-04 | ttuC       | ttuC tartrate dehydrogenase protein<br>1690575:1691654<br>reverse           | G - Carbohydrate transport and metabolism                        |
| <b>Hsero_1123</b> | 84  | 0.02    | Hsero_1123 | Hsero_1123 family II aminotransferase protein<br>1278563:1279939<br>reverse | H - Coenzyme transport and metabolism                            |
| <b>Hsero_1509</b> | 0.1 | 2.0E-03 | rplS       | rplS 50S ribosomal subunit protein L19<br>1731532:1731915<br>forward        | J - Translation, ribosomal structure and biogenesis              |
| <b>Hsero_0677</b> | 0.3 | 0.02    | ompW2      | ompW2 outer membrane W protein<br>741190:741927<br>forward                  | M - Cell wall                                                    |
| <b>Hsero_2580</b> | 0.4 | 5.0E-03 | lon        | lon ATP-dependent protease LA protein<br>2940893:2943301<br>reverse         | O - Posttranslational modification, protein turnover, chaperones |
| <b>Hsero_0085</b> | 20  | 0.04    | amtB       | amtB ammonium transporter transmembrane protein<br>99406:100938<br>forward  | P - Inorganic ion transport and metabolism                       |

|                   |     |          |            |                                                                                                         |                                                             |
|-------------------|-----|----------|------------|---------------------------------------------------------------------------------------------------------|-------------------------------------------------------------|
| <b>Hsero_2905</b> | 0.1 | 1.10E-03 | Hsero_2905 | Hsero_2905<br>conserved<br>hypothetical<br>protein<br>3301039:3301272<br>reverse                        | S - Function<br>unknown                                     |
| <b>Hsero_0083</b> | 15  | 0.03     | Hsero_0083 | Hsero_0083<br>membrane protein<br>98251:99039<br>forward                                                | S - Function<br>unknown                                     |
| <b>Hsero_2723</b> | 90  | 1.90E-03 | Hsero_2723 | Hsero_2723 methyl-<br>accepting<br>chemotaxis<br>transmembrane<br>protein<br>3101951:3103597<br>reverse | T;N - Signal<br>transduction<br>mechanisms;Cell<br>motility |
| <b>Hsero_1215</b> | 0.3 | 0.04     | trnK       | trnK tRNA-Lys<br>1374570:1374645<br>reverse                                                             | trnK                                                        |
| <b>Hsero_1466</b> | 0.2 | 1.7E-03  | trnL       | trnL tRNA-Leu<br>1689660:1689744<br>reverse                                                             | trnL                                                        |
| <b>Hsero_1546</b> | 0.1 | 0.03     | trnS       | trnS tRNA-Ser<br>1781783:1781873<br>forward                                                             | trnS                                                        |

Figure 1 – Diagram showing how rice roots were grown, inoculated with *H. seropedicae*, prepared for extraction of RNA and the RNA-seq analyses performed.

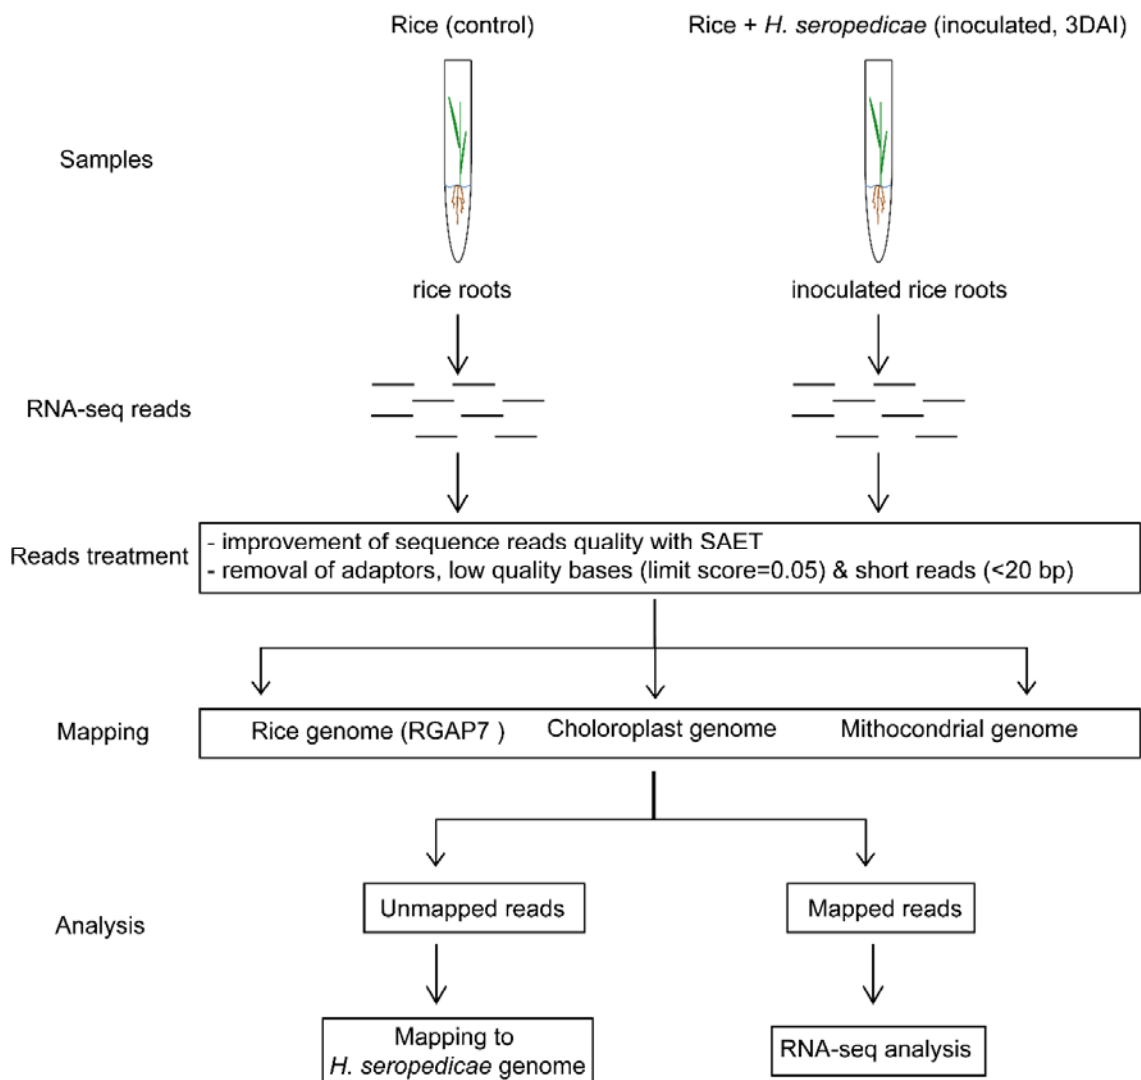

Figure 2 – Transcripts differentially expressed in rice roots colonised by *H. seropedicae*. Up-regulated genes are shown in the right-hand column (in gray) with down-regulated genes to the left (in black). Numbers of regulated genes and total numbers of expressed genes are shown beside each column. Transcripts are grouped according to metabolic categories determined using MapMan.

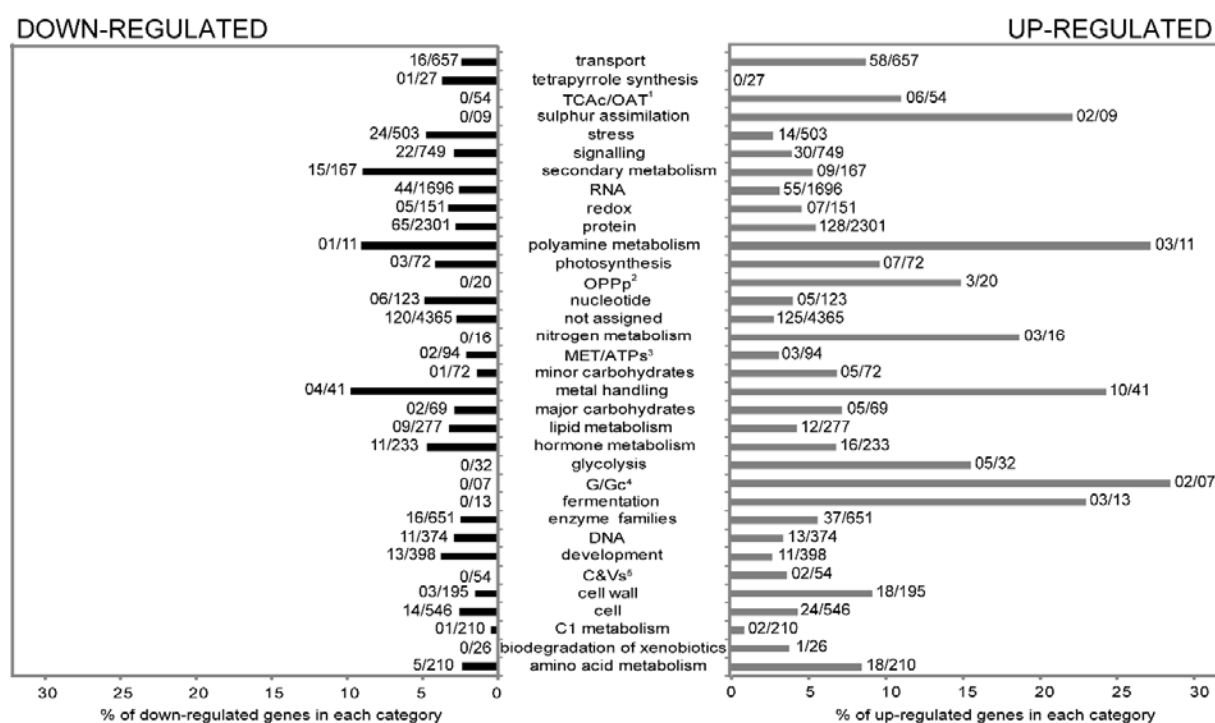

<sup>1</sup>TCA cycle/organic acids; <sup>2</sup>oxidative pentose phosphate pathway; <sup>3</sup>mitochondrial electron transport/ATP synthesis; <sup>4</sup>gluconeogenesis/glyoxylate cycle; <sup>5</sup>cofactor and vitamin synthesis. To be considered differentially transcripts must have had at least two-fold coverage and P-values < 0.05.

Figure 3 –Biotic stress pathways regulated by *H. seropedicae* in rice roots. The scheme was constructed using MapMan (only genes with fold change  $\geq 2$ ,  $\leq 2$ ). Dark gray squares represent genes shown in these experiments to be involved in the biotic stress. On the left- and right-hand sides (shaded in light grey) are genes possibly involvement in biotic stress. Smaller squares represent up-regulated (blue) or down-regulated (red) genes.

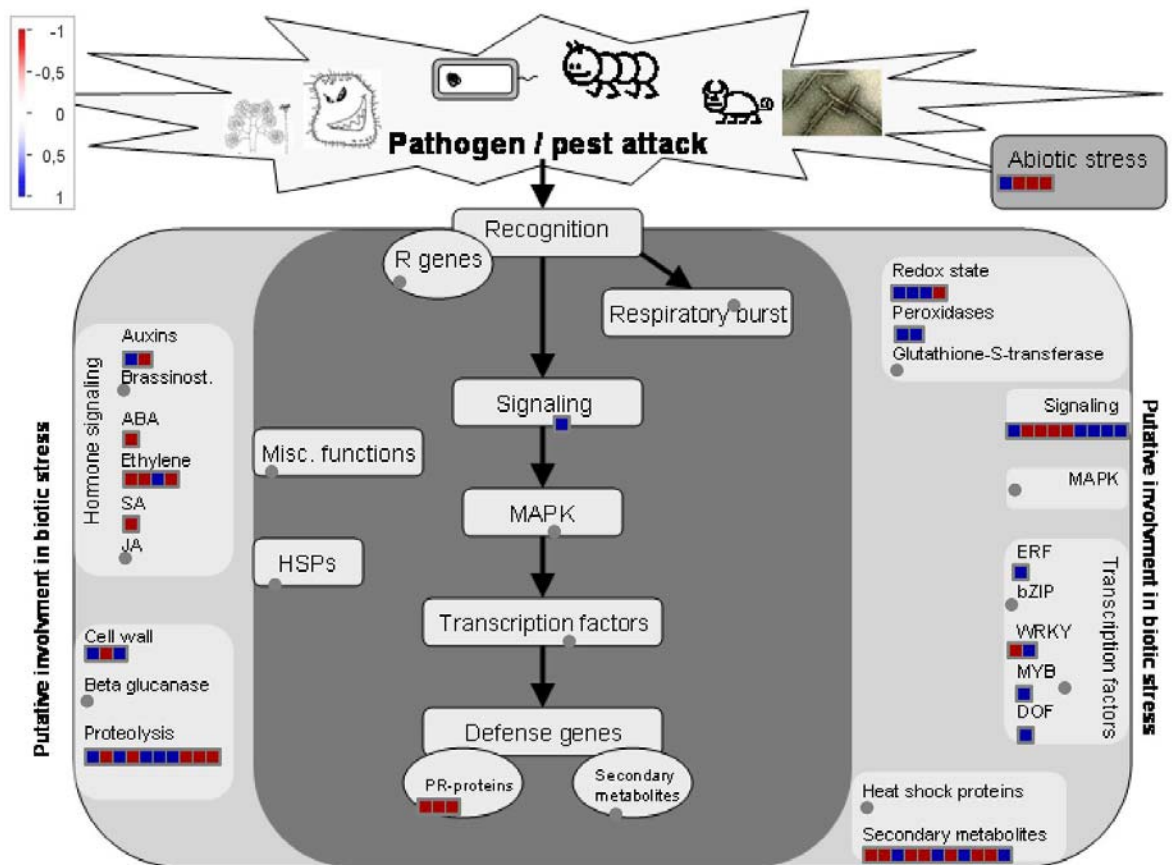

Figure 4: Confirmation of differential expression of rice genes by qRT-PCR and RNA-Seq. The results are average of three independent samples and error bars represent, the standard deviation. The reference genes used for the analysis were actin 1, tubulin beta-2 chain and conserved hypothetical protein.

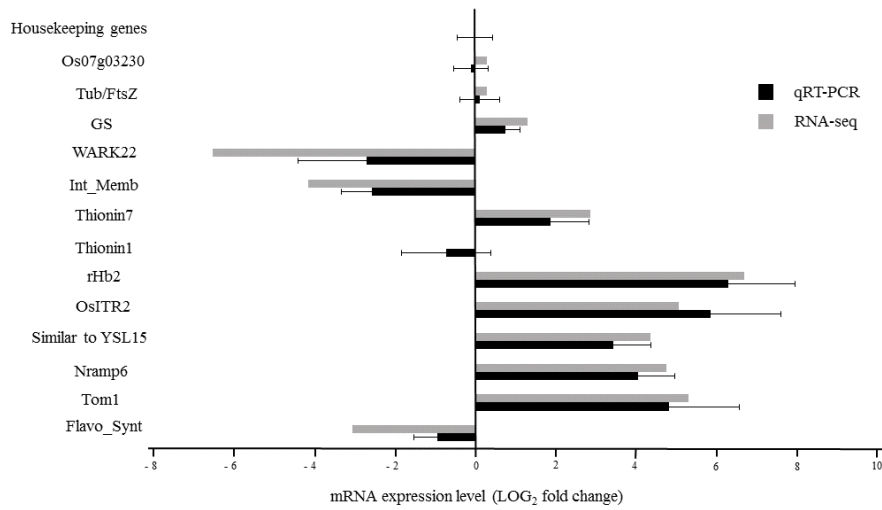

Figure 5: Isoprenoid synthesis genes down-regulated in rice roots colonised by *H. seropedicae*. The names of the genes differentially expressed are shown and the numbers in parentheses represent the fold change. The components of the MEP pathway leading to geranylgeranyl diphosphate synthesis and the diterpenoid- phytoalexin pathway are: G3P, glyceraldehyde-3-phosphate; DXP, 1-deoxy-D-xylulose 5-phosphate; MEP, 2-C-methyl-D-erythritol 4-phosphate; CDP-ME, 4-(cytidine 5-diphospho)-2-C-methyl-D-erythritol; CDP-ME2P, 2-phospho-4-(cytidine 5'-diphospho)-2-C-methyl-D-erythritol; MEC-DP, 2-C-methyl-D-erythritol 2,4-cyclodiphosphate; HMBDP, 1-hydroxy-2-methyl-2-butenyl 4-diphosphate; IPP, isopentenyl diphosphate; DMAPP, dimethylallyl diphosphate; GGDP, geranylgeranyl diphosphate; and CDP, copalyl diphosphate. Enzymes are indicated in rose coloured circles: DXS, 1-deoxy-D-xylulose 5-phosphate synthase; DXR, DXP reductoisomerase; CMS, CDP-ME synthase; CMK, CDP-ME kinase; MCS, MECDP synthase; HDS, HMBDP synthase; HDR, HMBDP reductase; IPI, IPP isomerase; GGPS, GGDP synthase; OsCyc1, syn-CDP synthase; OsCyc2, ent-CDP synthase; OsDTC2, stemar-13-ene synthase.

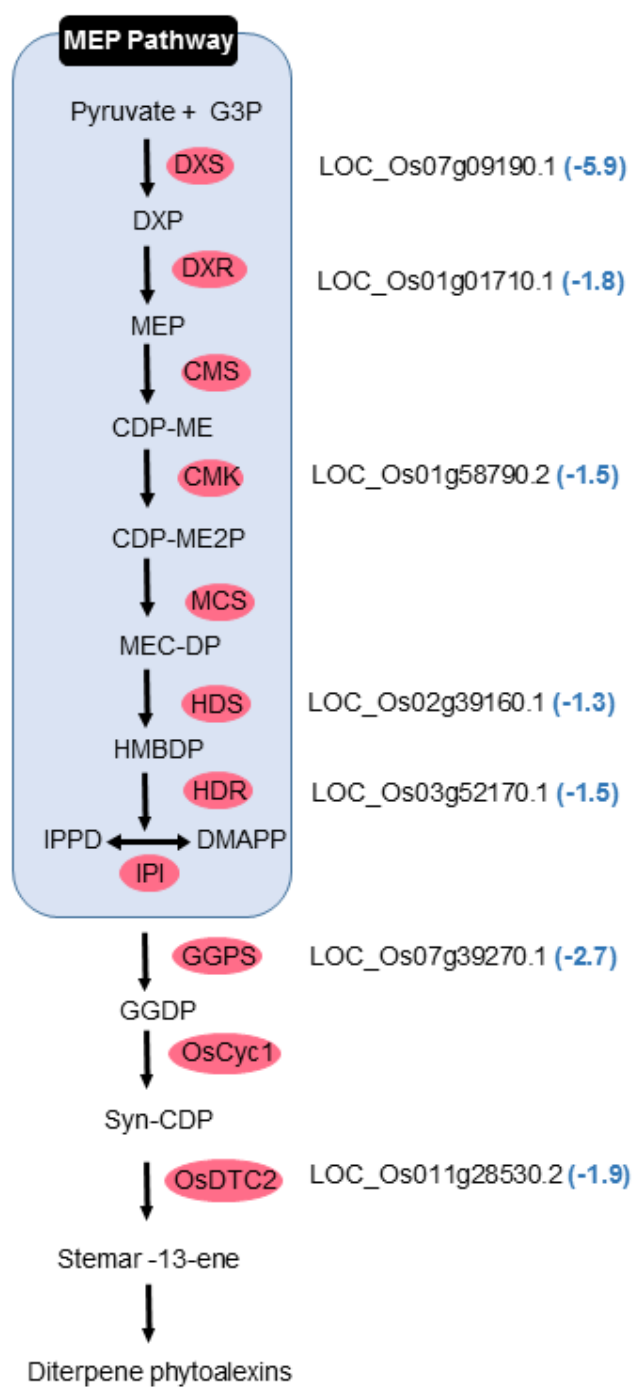



Figure 6: Differentially expressed genes in rice roots following colonisation by *H. seropedicae*. Genes involved in siderophore synthesis and transport, the methionine salvage pathway and ethylene synthesis are shown. Numbers in parentheses represent the fold change.

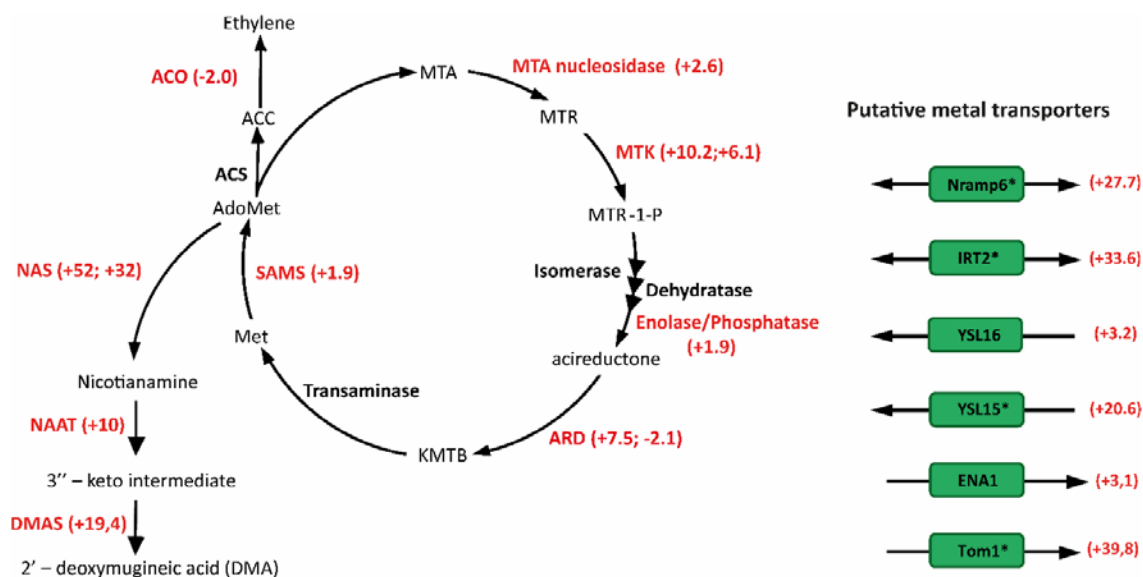

*H. seropedicae* SmR1 induces methionine recycling and mugineic acid (MA) synthesis as well as the expression of transporters involved in iron metabolism. The expression of those genes marked with an asterisk was confirmed by RT-qPCR

Abbreviations: AdoMet, S-adenosylmethionine; ACC, 1-aminocyclopropane-1-carboxylate; ACS, 1-aminocyclopropane-1-carboxylate synthase; ACO, 1-aminocyclopropane-1-carboxylate oxidase; MTA, 5'-methylthioadenosine; MTR, 5'-methylthioribose; MTK, methylthioribose kinase; MTR-1-P, 5'-methylthioribose-1-phosphate; KMTB, 2-keto-4-methylthiobutyrate; ARD, acireductone dioxygenase; SAMS, S-adenosylmethionine synthetase; NAS, nicotianamine synthase; NAAT nicotianamine aminotransferase; DMAS, deoxymugineic acid synthase; Tom1, transporter of mugineic acid 1; ENA1 (efflux transporters of nicotianamine 1); Nrap6, Natural Resistance-Associated Macrophage

Protein; IRT2(iron-regulated transporter 2); YSL16 (yellow strip-like gene 16); YSL15  
(yellow strip-like gene 15)

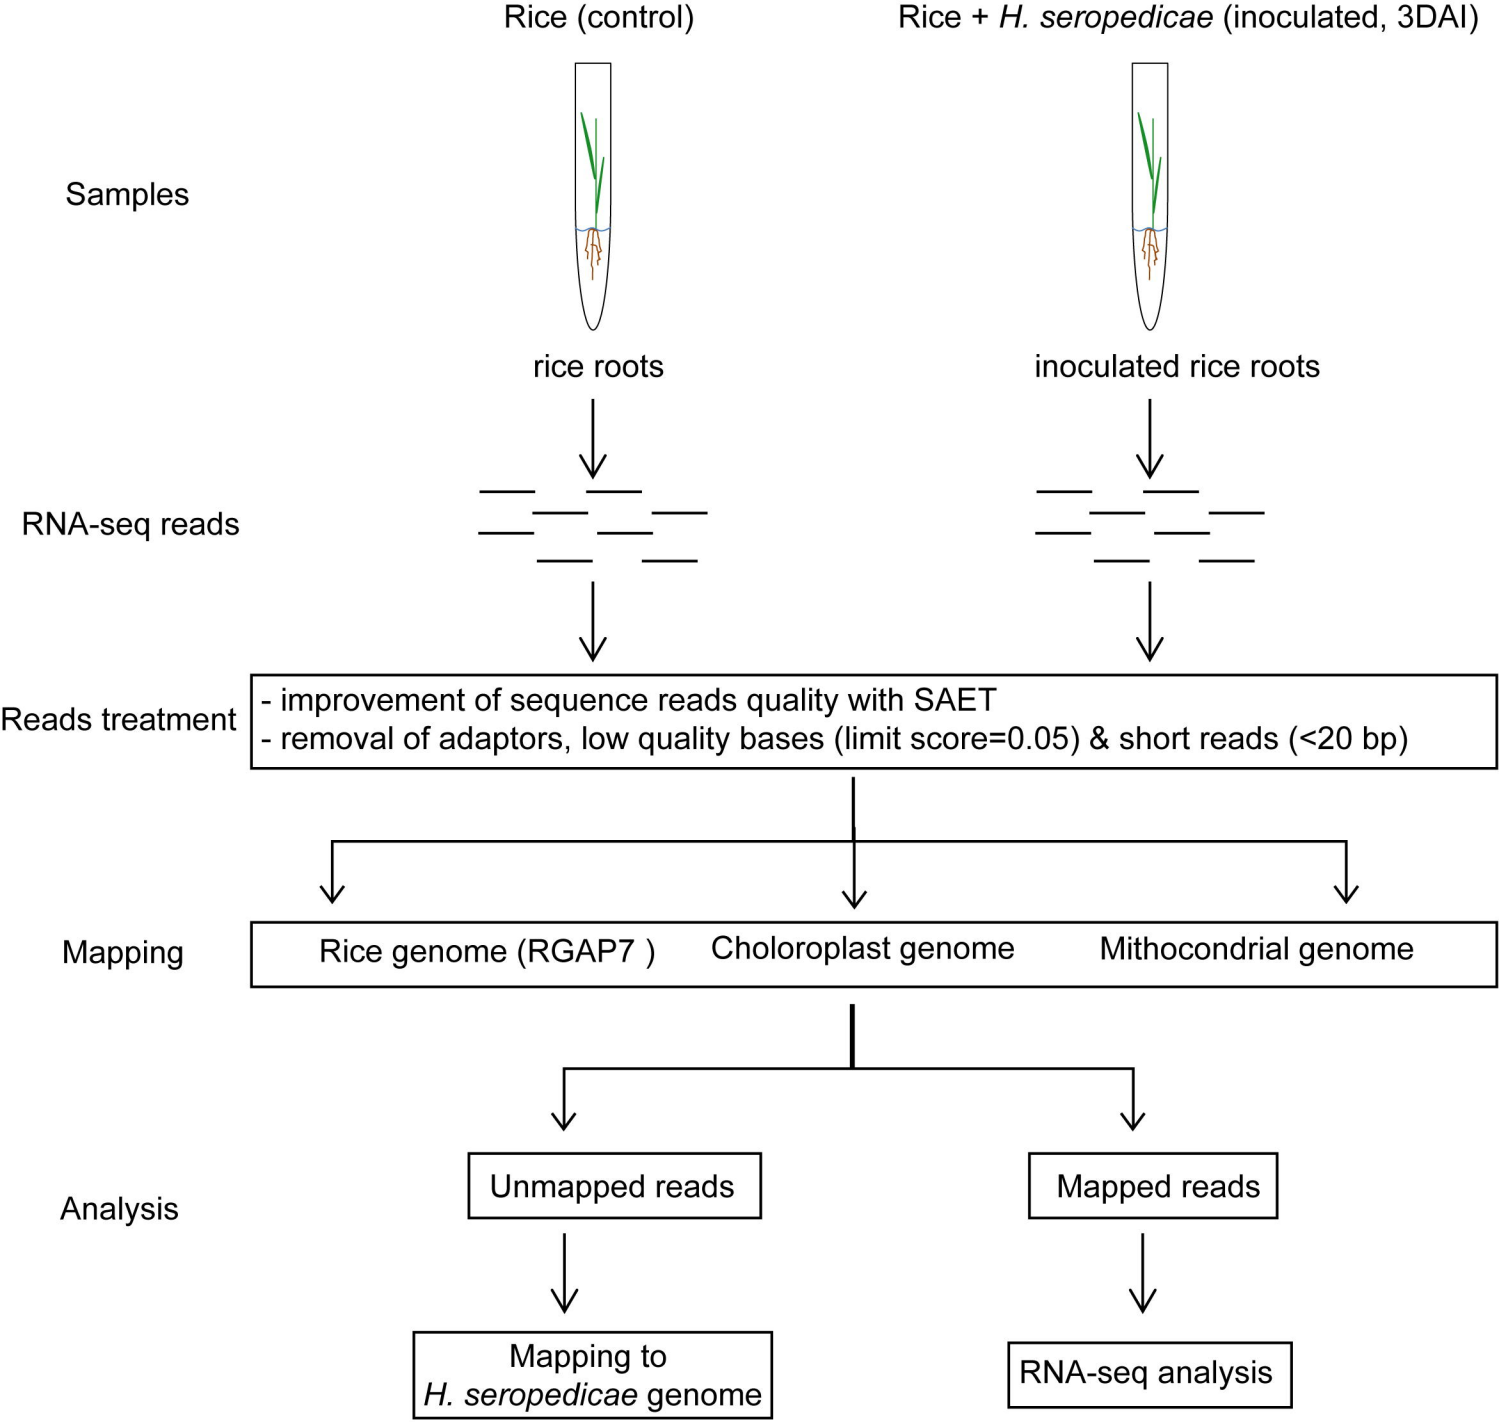

## DOWN-REGULATED

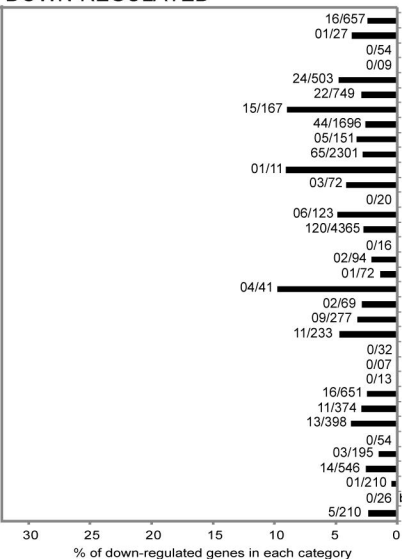

## UP-REGULATED

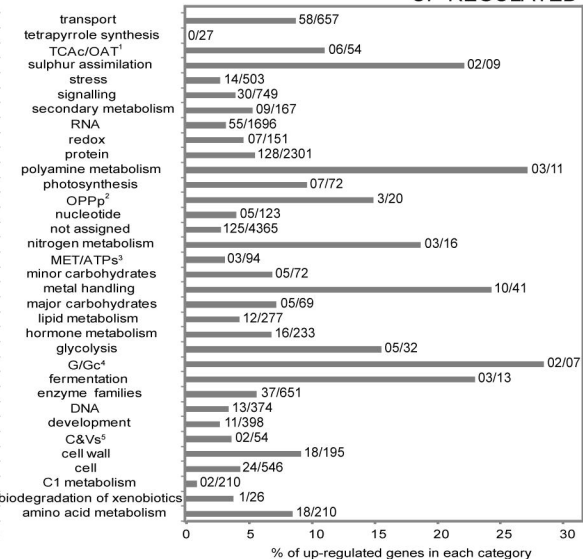

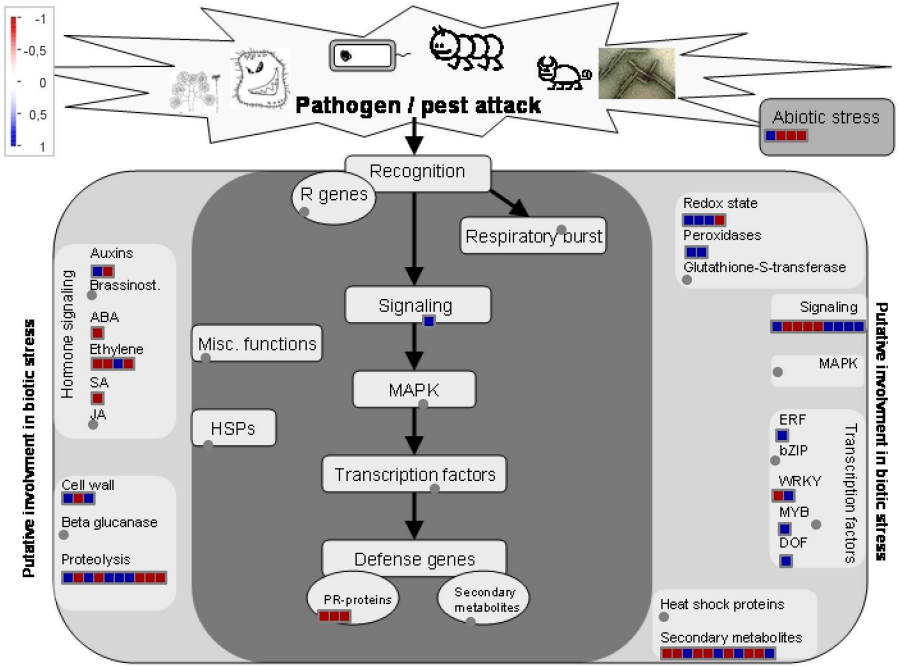

Housekeeping genes

Ga1g00210

Taf11a2

G6

YOR121

Int\_Minc6

Thosin7

Thosin1

rR2

Ga1R2

Similar to YNL15

Strap8

Toni

Flavo\_Nyat

■ qRT-PCR  
■ RNA-seq

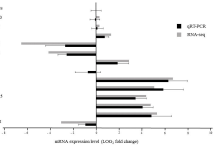

# MEP Pathway

Pyruvate + G3P

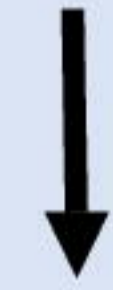

**DXS**

LOC\_Os07g09190.1 (-5.9)

DXP

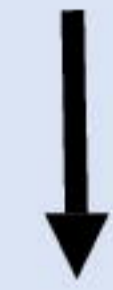

**DXR**

LOC\_Os01g01710.1 (-1.8)

MEP

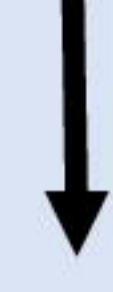

**CMS**

CDP-ME

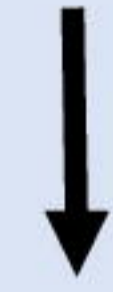

**CMK**

LOC\_Os01g58790.2 (-1.5)

CDP-ME2P

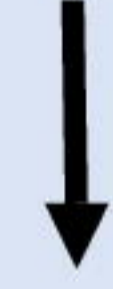

**MCS**

MEC-DP

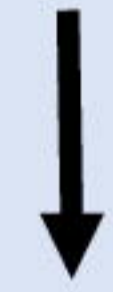

**HDS**

LOC\_Os02g39160.1 (-1.3)

HMBDP

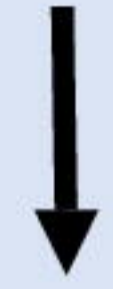

**HDR**

LOC\_Os03g52170.1 (-1.5)

IPPD

DMAPP

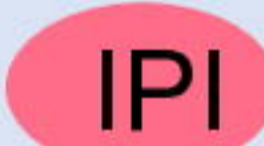

**IPI**

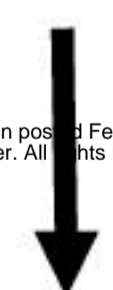

**GGPS**

LOC\_Os07g39270.1 (-2.7)

GGDP

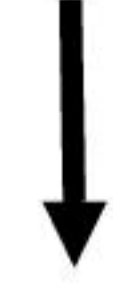

**OsCyc1**

Syn-CDP

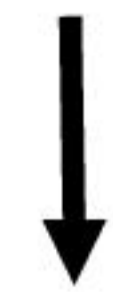

**OsDTC2**

LOC\_Os011g28530.2 (-1.9)

Stemar -13-ene

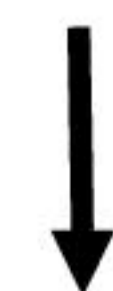

Diterpene phytoalexins

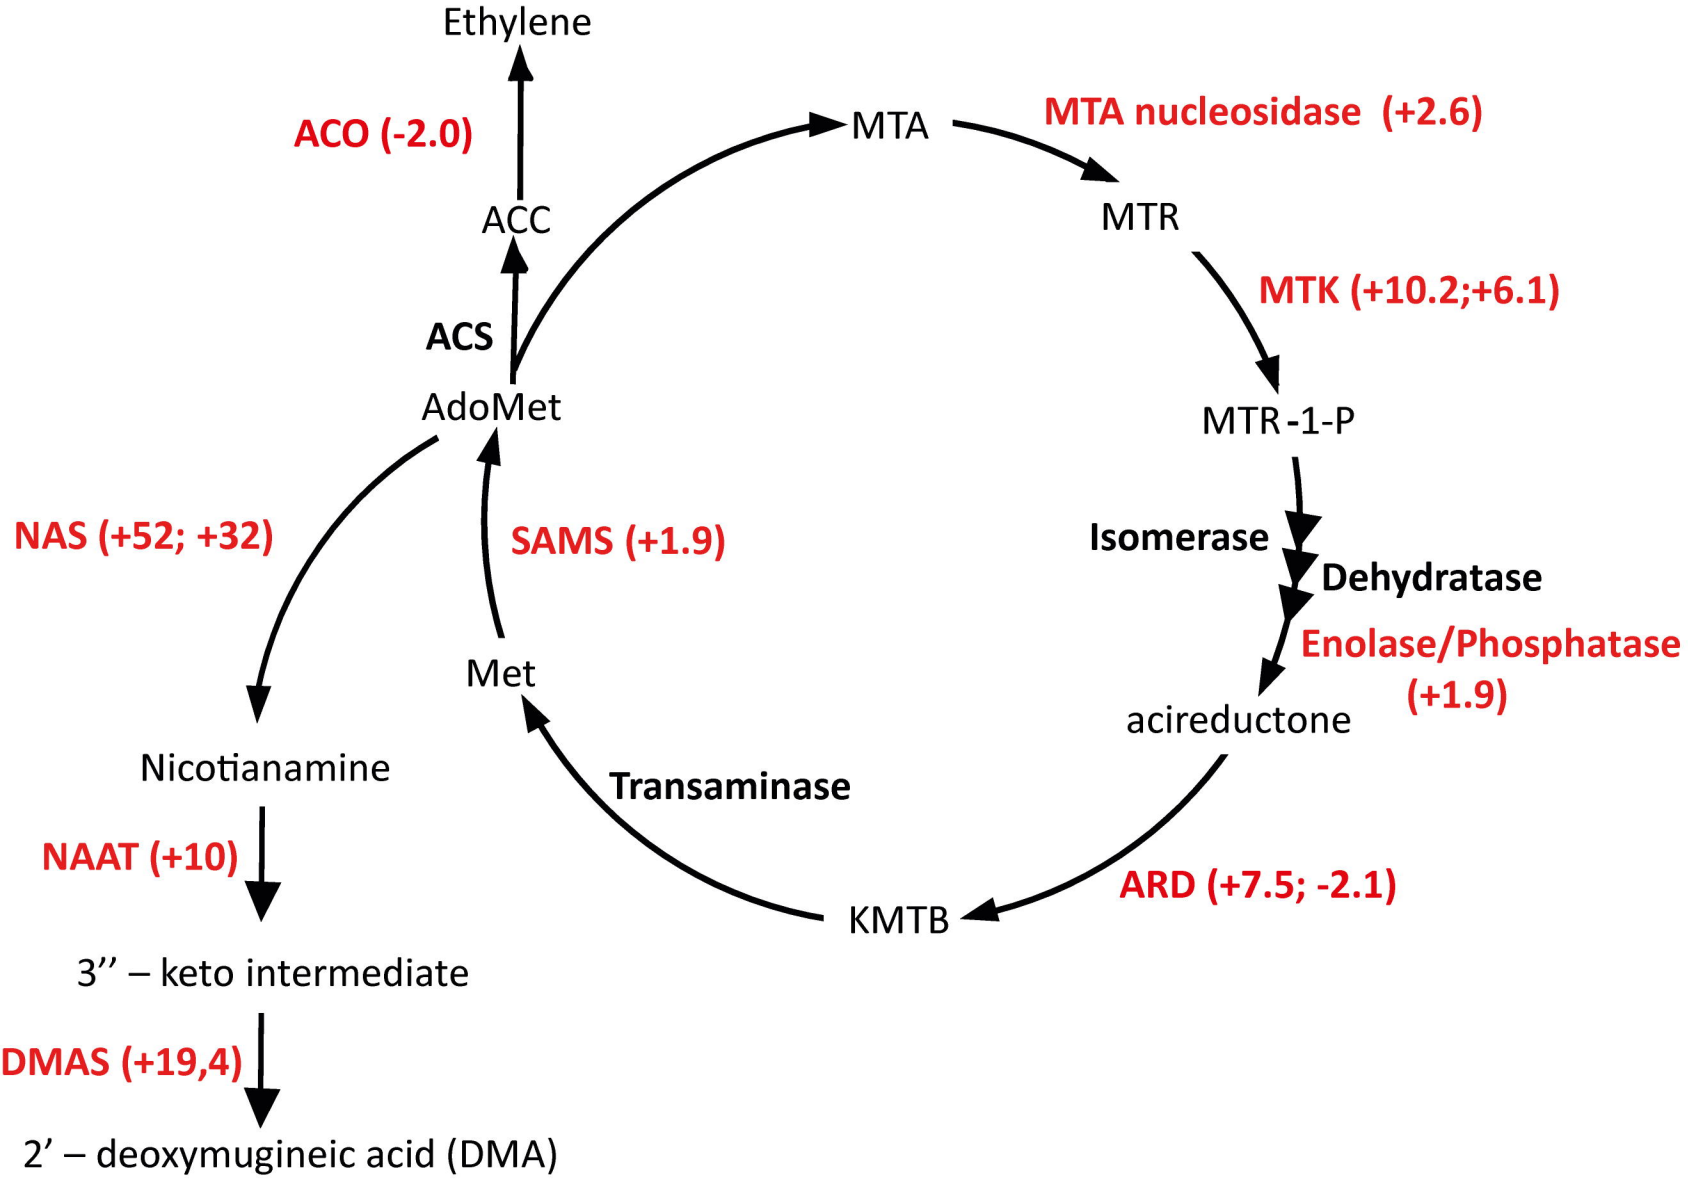

### Putative metal transporters

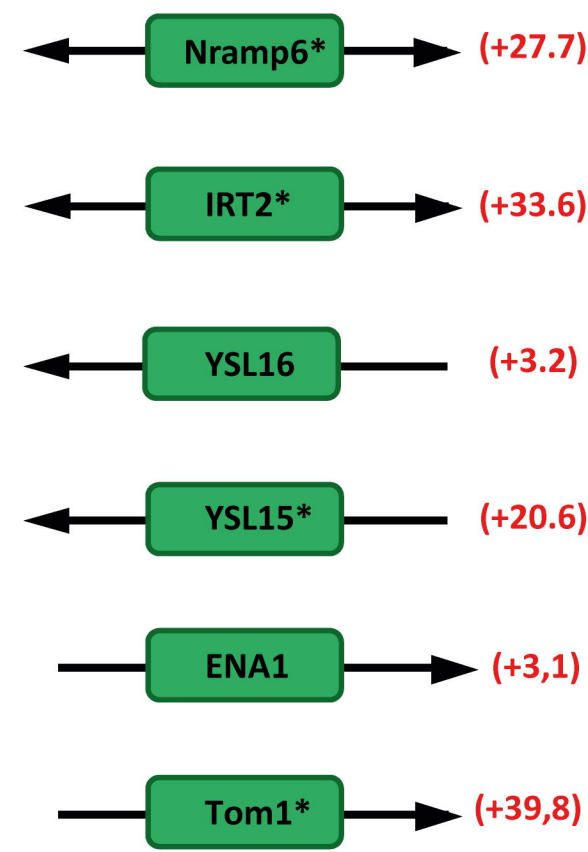

Source: http://biorxiv.org/content/10.1101/260380v1.full.pdf
